# Supplementary material for: Identification of novel cancer therapeutic targets using a designed and pooled shRNA library screen
Source: PubMed Central journal article supplement (PMC5320502; doi:10.1038/srep43023), 2017-02-22
Supplement: srep43023-s1.pdf [file srep43023-s1.pdf]

# Supplemental Information

## Identification of novel cancer therapeutic targets using a designed and pooled shRNA library screen

**David Oliver<sup>1,\*</sup>, Hao Ji<sup>1,\*</sup>, Piaomu Liu<sup>2,4</sup>, Alexander Gasparian<sup>1</sup>, Ellen Gardiner<sup>1</sup>, Samuel Lee<sup>1</sup>, Adrian Zenteno<sup>1</sup>, Lillian O Perinskaya<sup>1</sup>, Mengqian Chen<sup>1</sup>, Phillip Buckhaults<sup>1</sup>, Eugenia Broude<sup>1</sup>, Michael D Wyatt<sup>1</sup>, Homayoun Valafar<sup>3</sup>, Edsel Peñna<sup>2</sup>, and Michael Shtutman<sup>1,\*</sup>**

<sup>1</sup>University of South Carolina, College of Pharmacy, Department of Drug Discovery and Biomedical Sciences, Columbia, SC 29208, USA

<sup>2</sup>University of South Carolina, College of Arts and Sciences, Department of Statistics, Columbia, SC 29208, USA

<sup>3</sup>University of South Carolina, College of Engineering and Computing, Department of Computer Sciences and Engineering, Columbia, SC 29208, USA

<sup>4</sup>Bentley University, Waltham, MA 02452, USA

\*shtutmanm@sccp.sc.edu

\*these authors contributed equally to this work

Supplemental Figures 1 – 8

Supplemental Tables S1 – S9

Supplemental DataSets S1,S2

# Supplementary Figure 1: Genetic Suppressor Element selection procedure

(a)

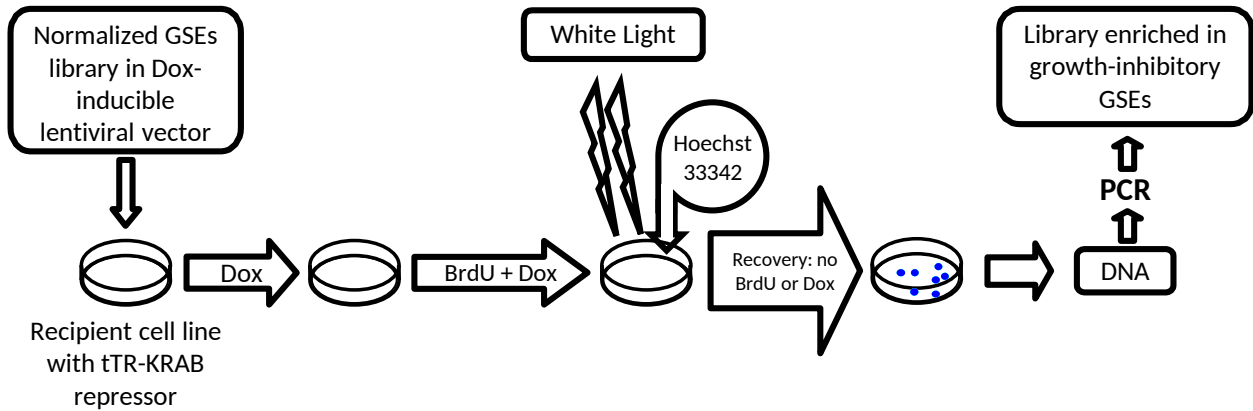

The selection enriches for arrested cells, while eliminating growing cells

(b)

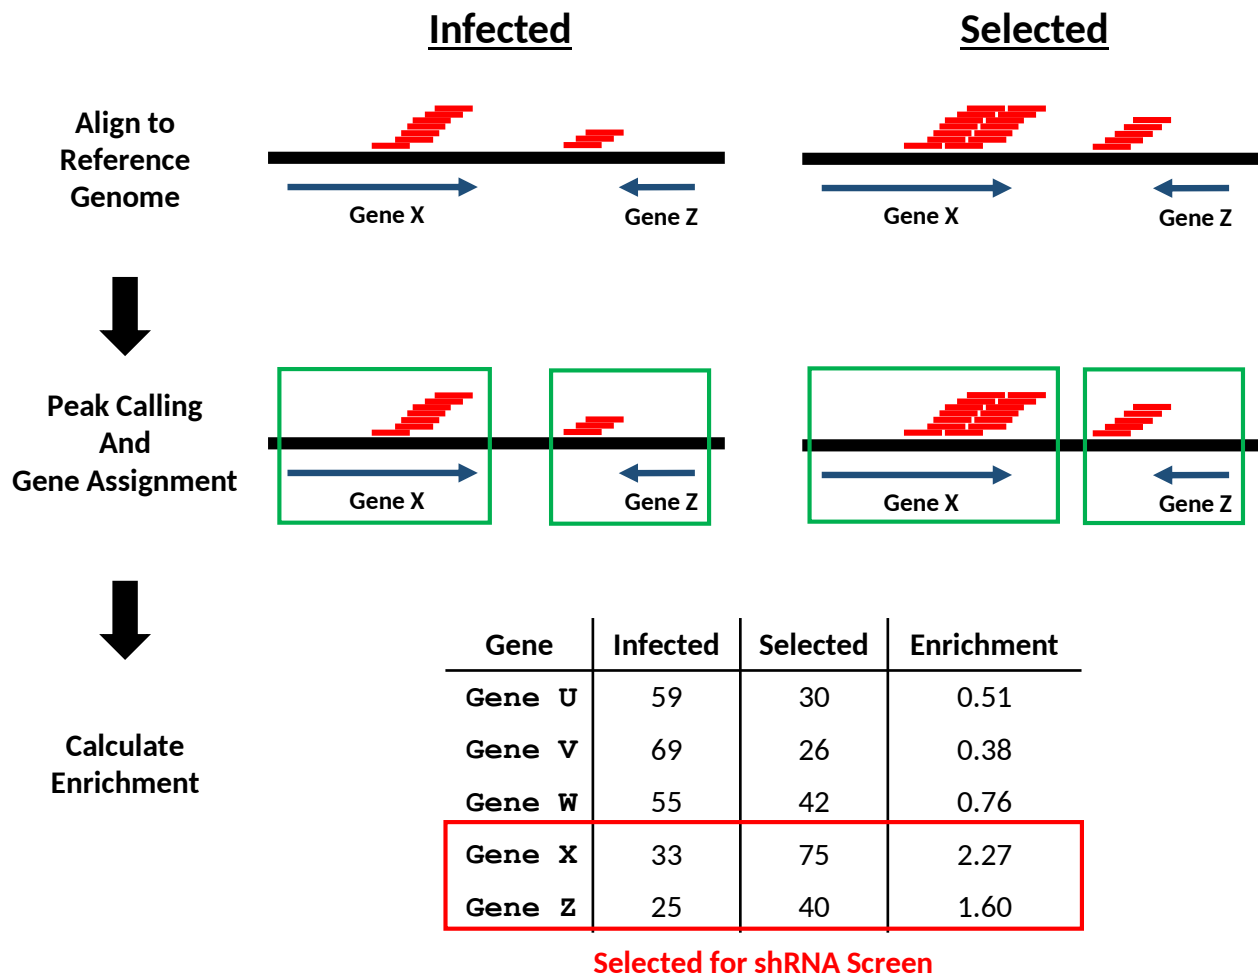

(a) Genetic suppressor element-containing, Doxycyclin-inducible vectors are infected into a panel of normal and cancer cell lines. GSE-vector expression is induced by Doxycycline (DOX) treatment and then submitted to BrdU suicide selection for 72 hrs. BrdU-containing DNA is cross-linked with the addition of Hoechst 33342 and white light. DOX and BrdU are then removed to allow cells to recover. Finally, GSEs are recovered from genomic DNA through PCR amplification and sequencing. (B) Recovered GSEs from infected (no selection) and selected cells are aligned to the reference genome and peaks are called with CLC Workbench (Qiagen). Peaks are assigned to the nearest gene and reads per gene are quantified. Genes with > 1.5 fold enrichment in selected over infected were used for focused shRNA screen.

# Supplementary Figure 2: shRNA library design and recovery

(a)

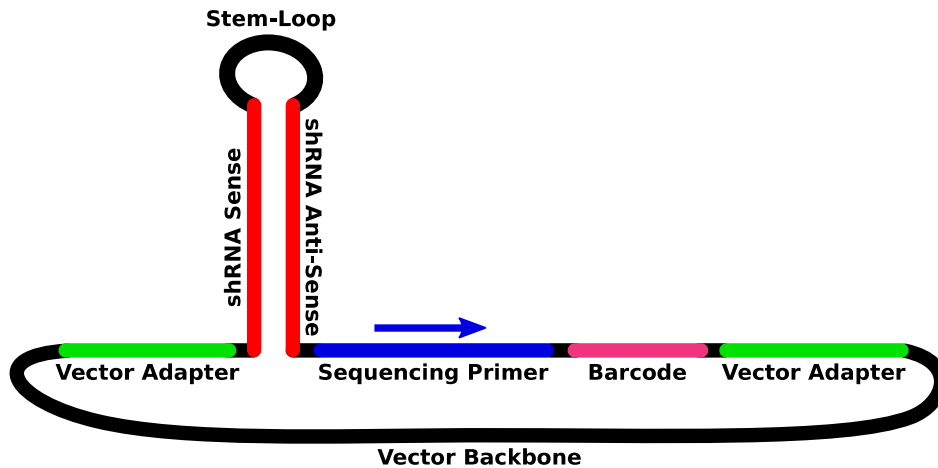

(b)

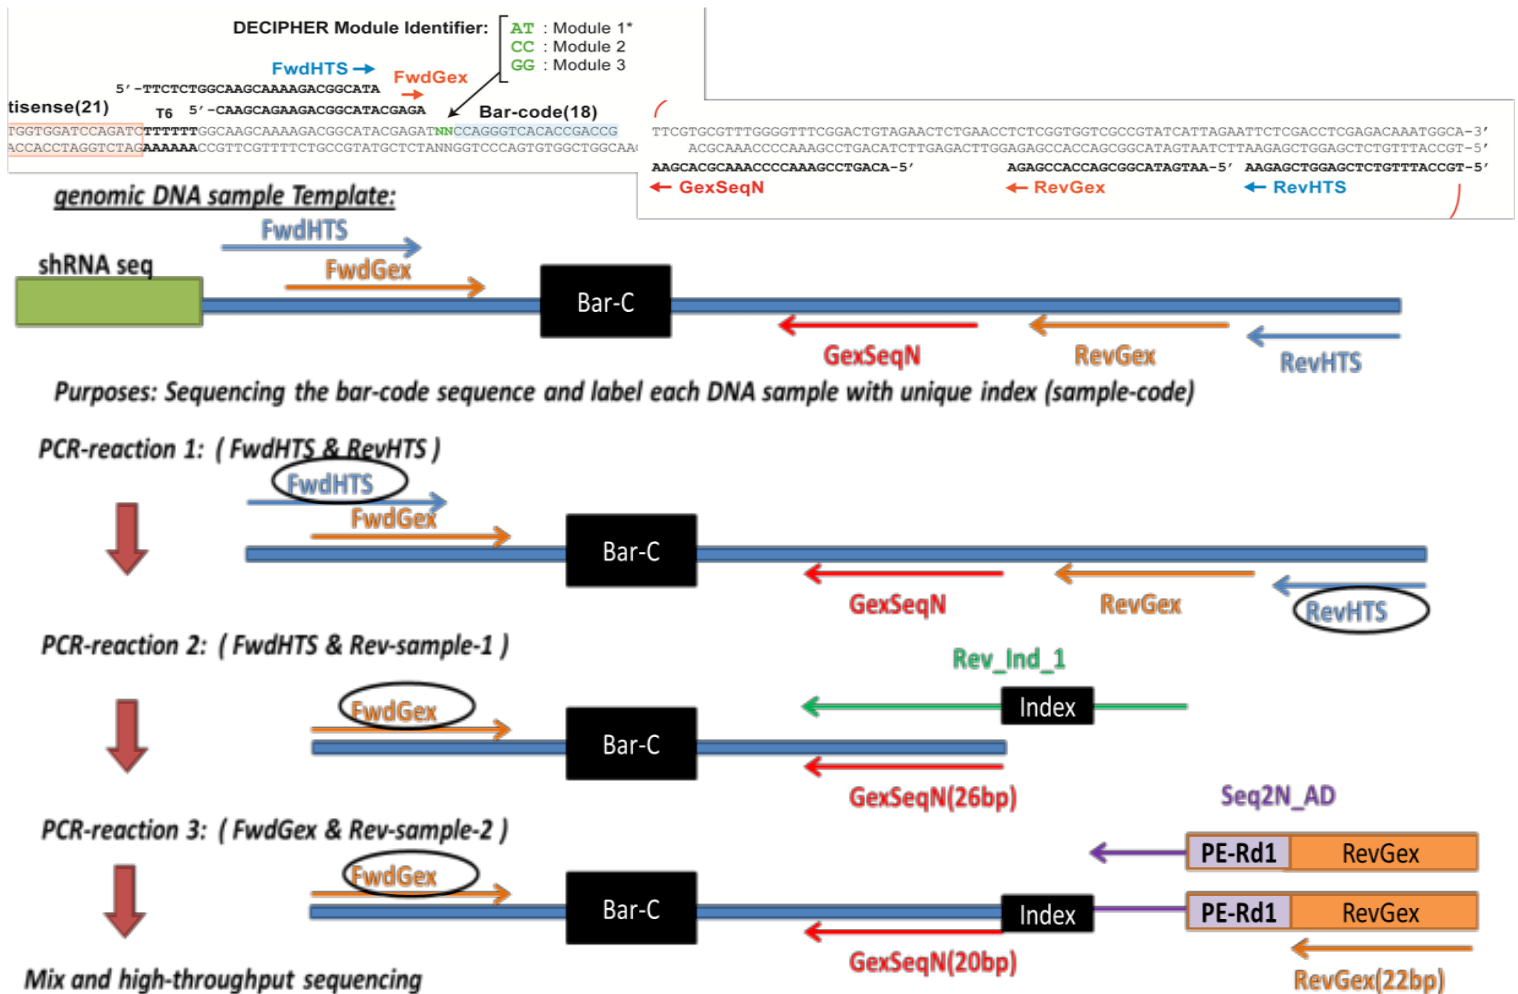

(a) Designed shRNA oligonucleotides containing vector adapters, shRNA hairpin, sequencing primer, and shRNA-specific barcode are incorporated into a lentiviral vectors and amplified before being applied to 293FT cells for viral production. (b) After viral library selection (Figure 1), shRNA-specific barcodes are recovered from selected cells through 3-step PCR amplification. The resulting barcodes are then indexed with custom indexes for multiplex high-throughput sequencing.

# Supplementary Figure 3: Verification of normality assumption for linear model

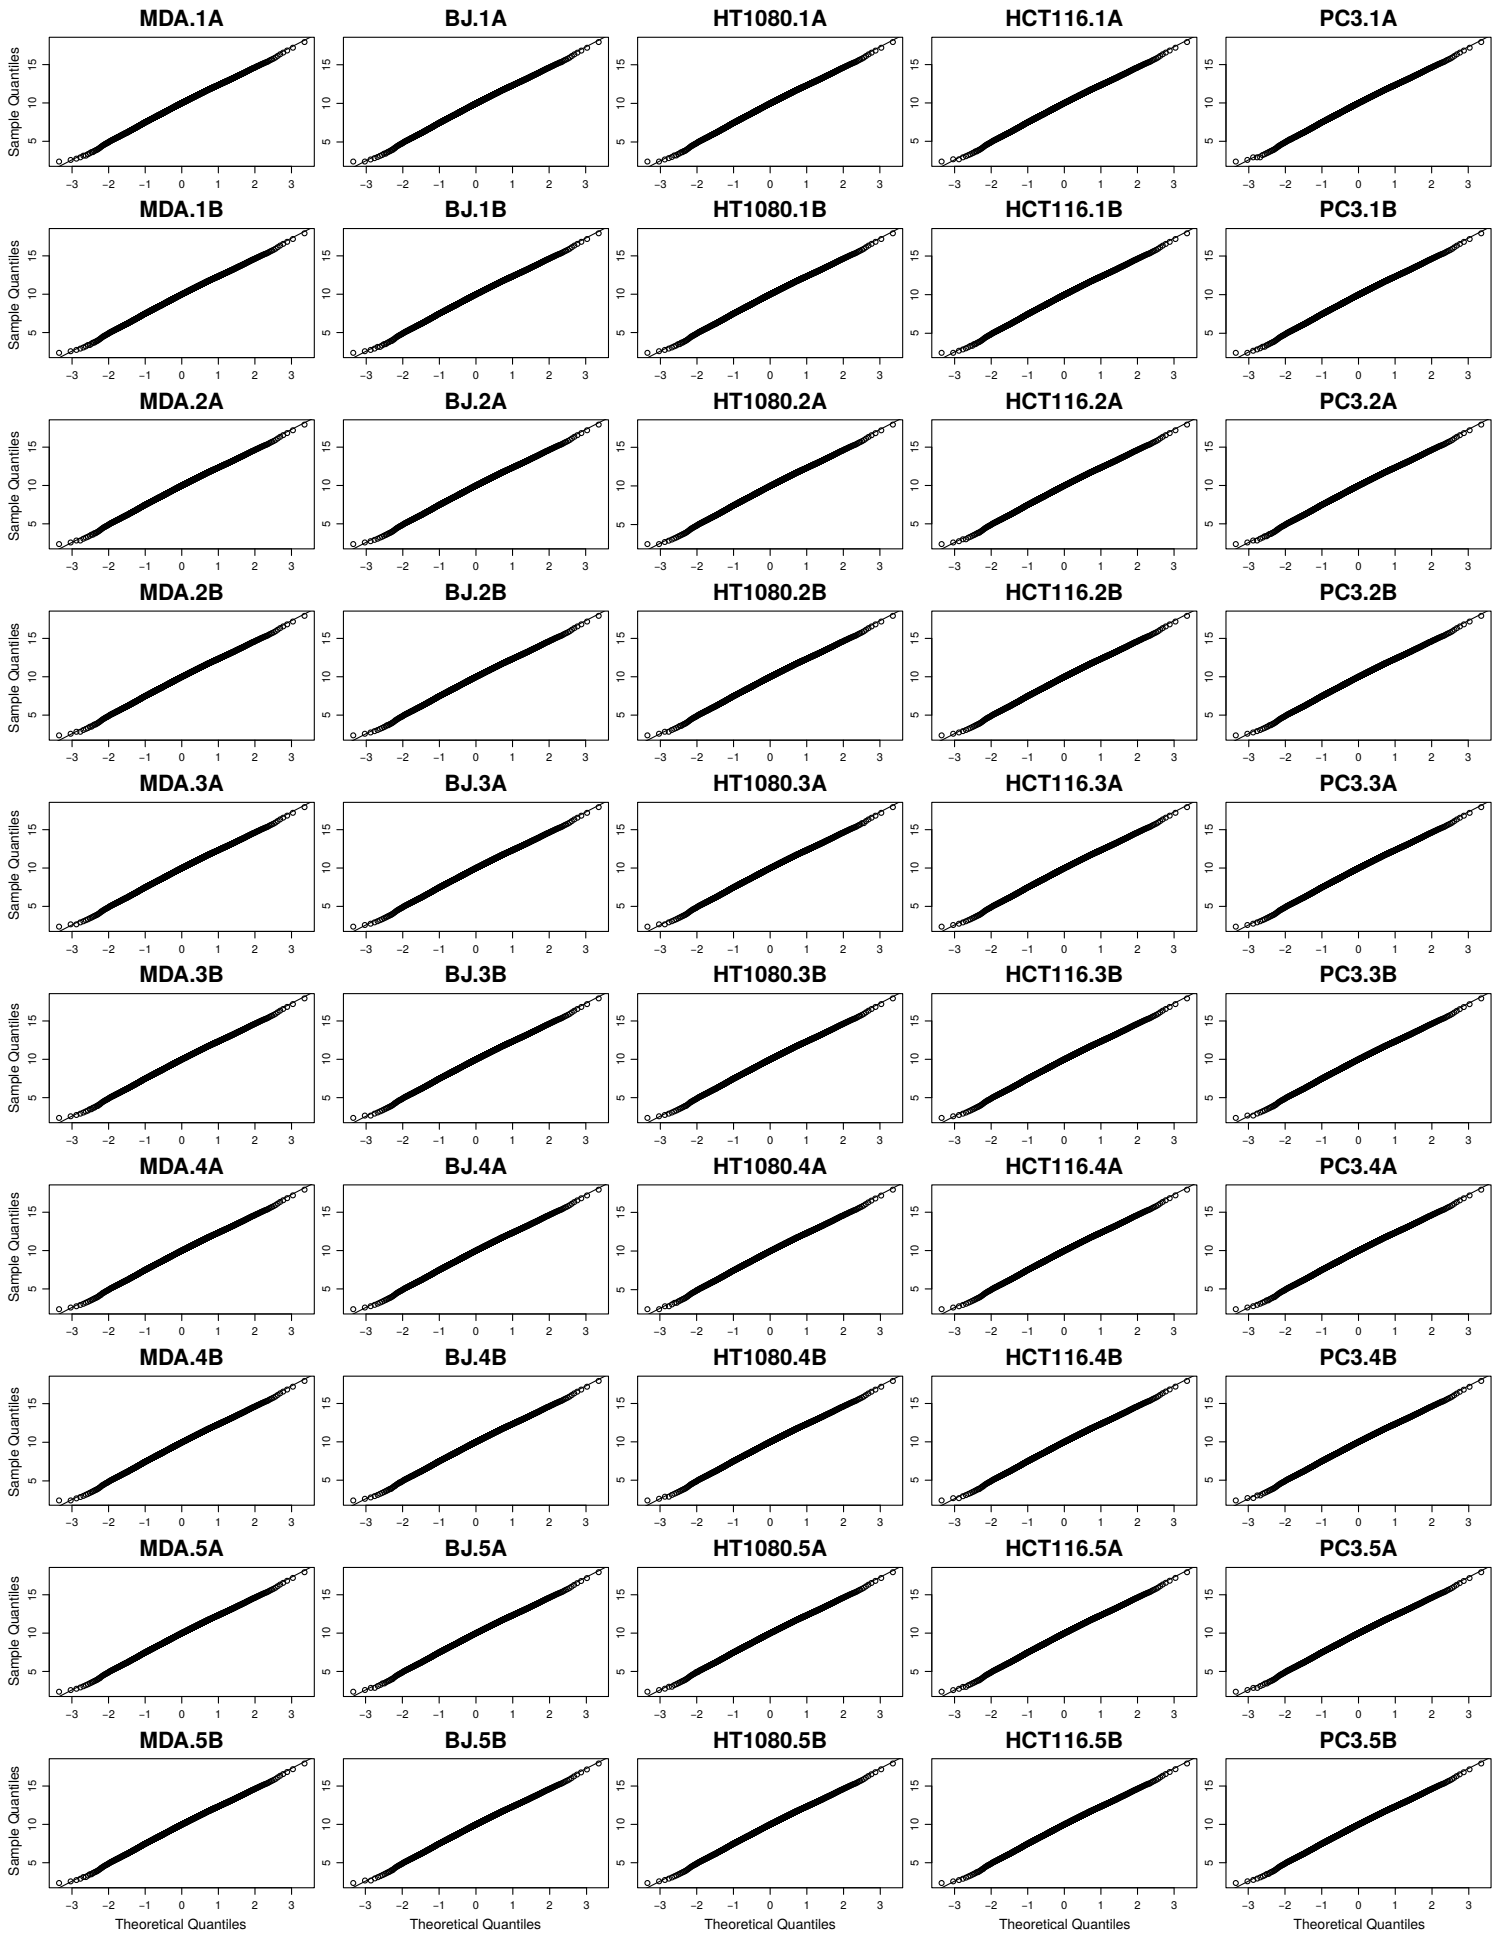

Quantile-quantile plots showing normality of shRNA reads after normalization. Each panel corresponds to a cell line, passage number (1-5), and biological replicate (A or B).

# Supplementary Figure 4: Correlation of shRNA reads across replicates and passages

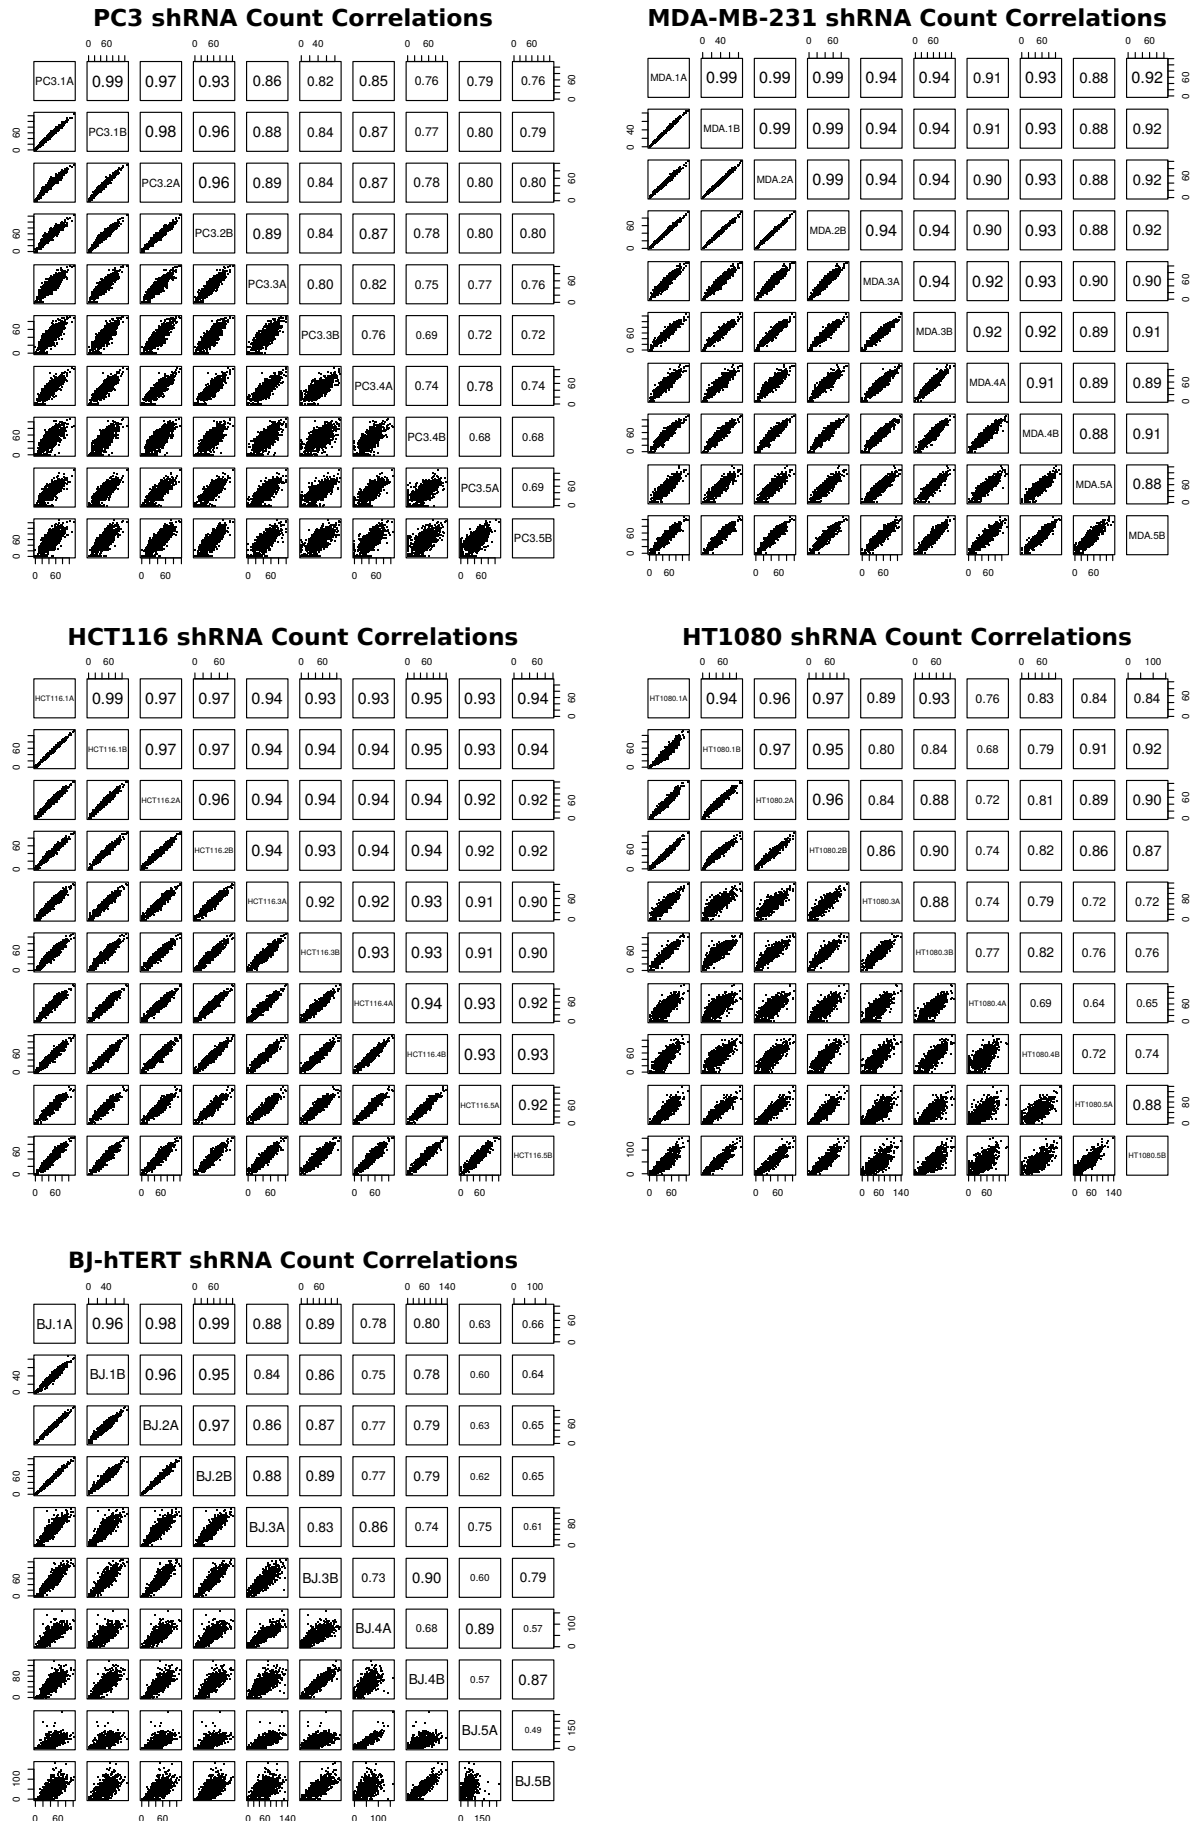

Each panel displays the correlation matrix across replicates and passages for each cell line. The lower triangle in each panel shows the scatter plot for shRNA reads. The upper triangle contains the correlation coefficient for the corresponding passage and replicate.

## Supplemental Figure 5: Magnification of Figure 4

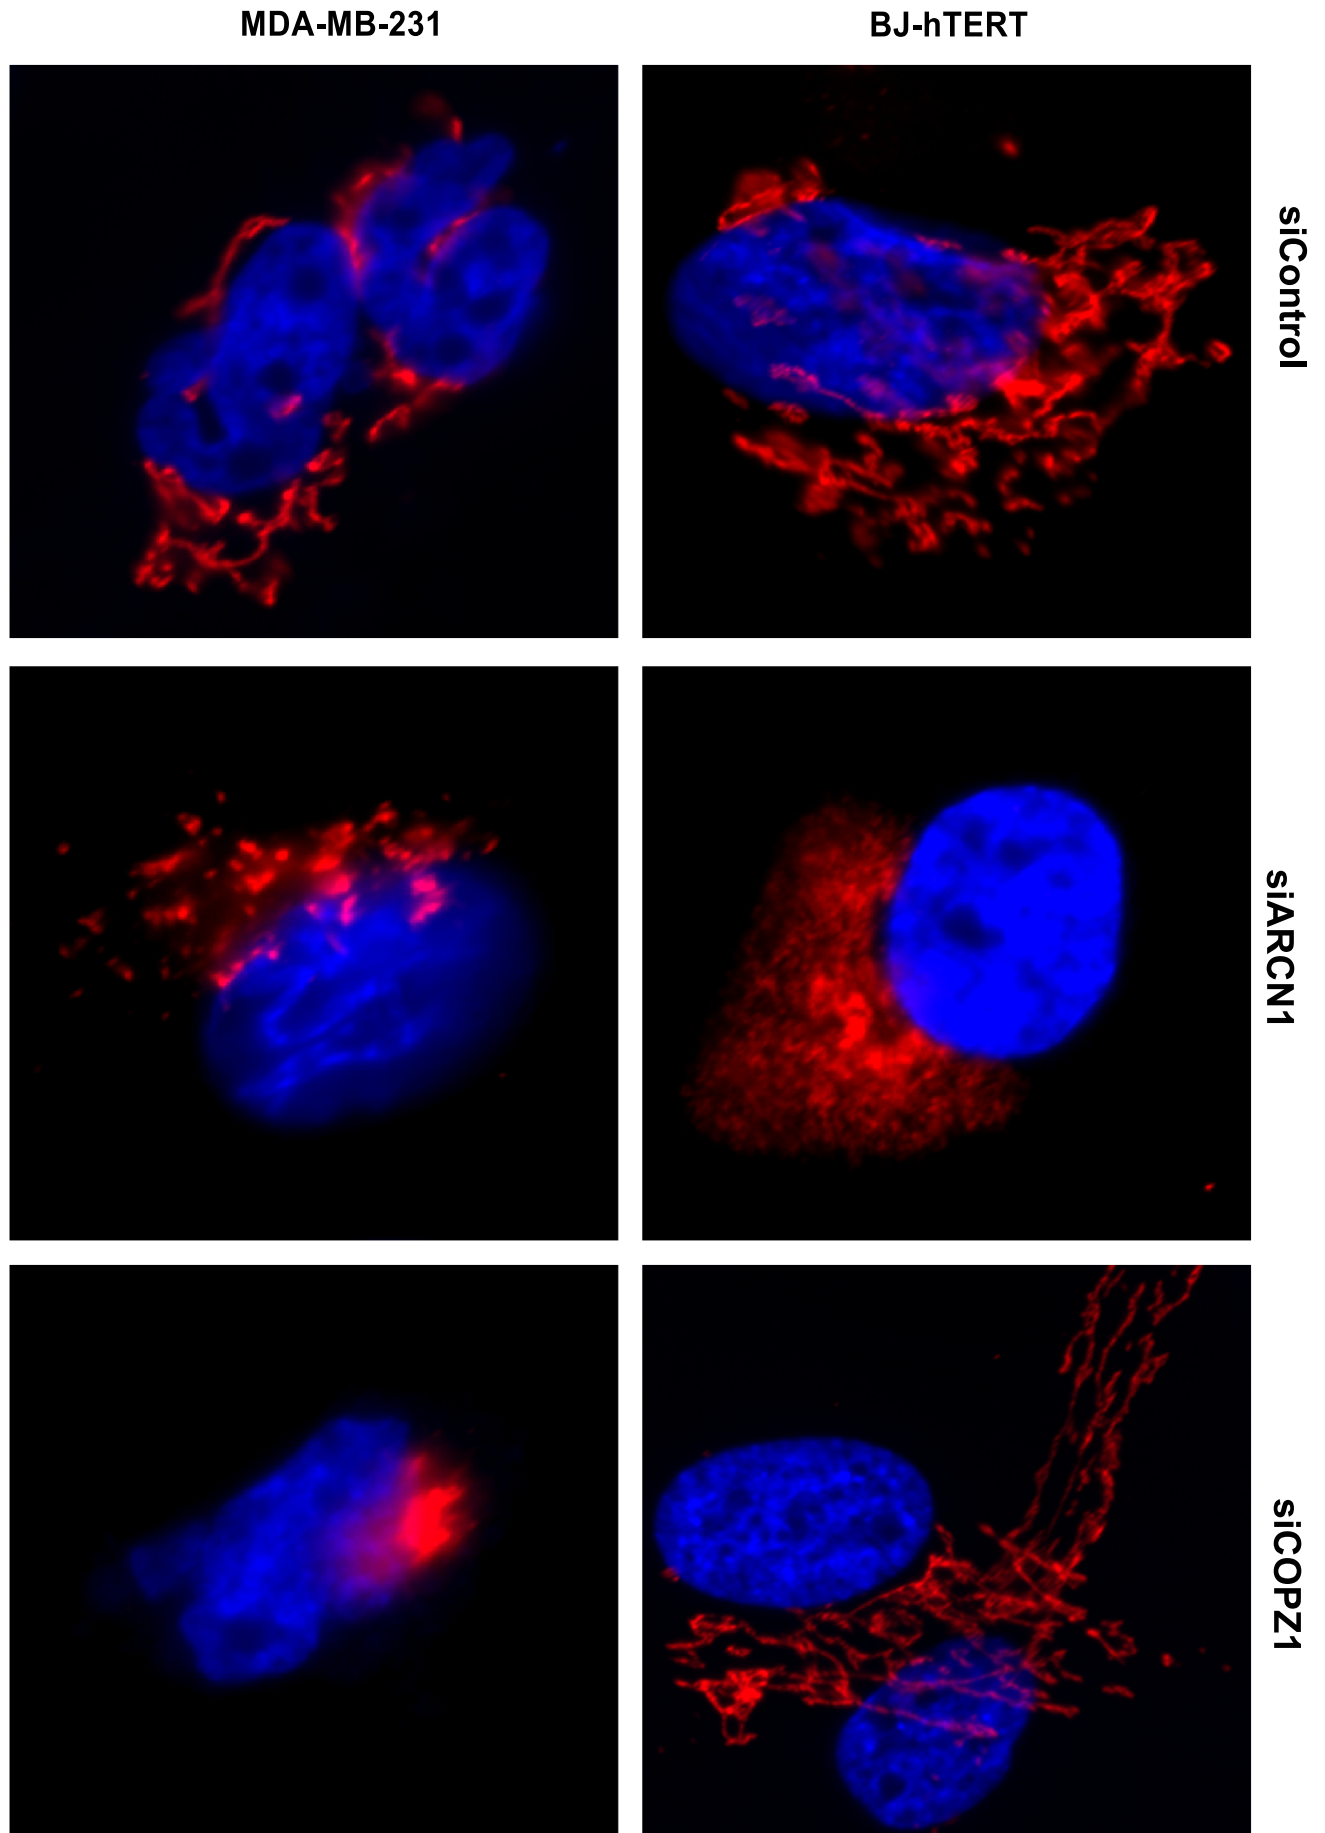

Disruption of Golgi structure after siRNA depletion of ARC1 and COPZ1. Tubular structure in siControl sample indicates normal Golgi structure while ARC1 produces dispersed vesicles in both normal and cancer cells. COPZ1 depletion produces abnormal Golgi structure in MDA-MB-231 but not in BJ-hTERT.

# Supplementary Figure 6: Golgi disruption by ARCN1 depletion over time

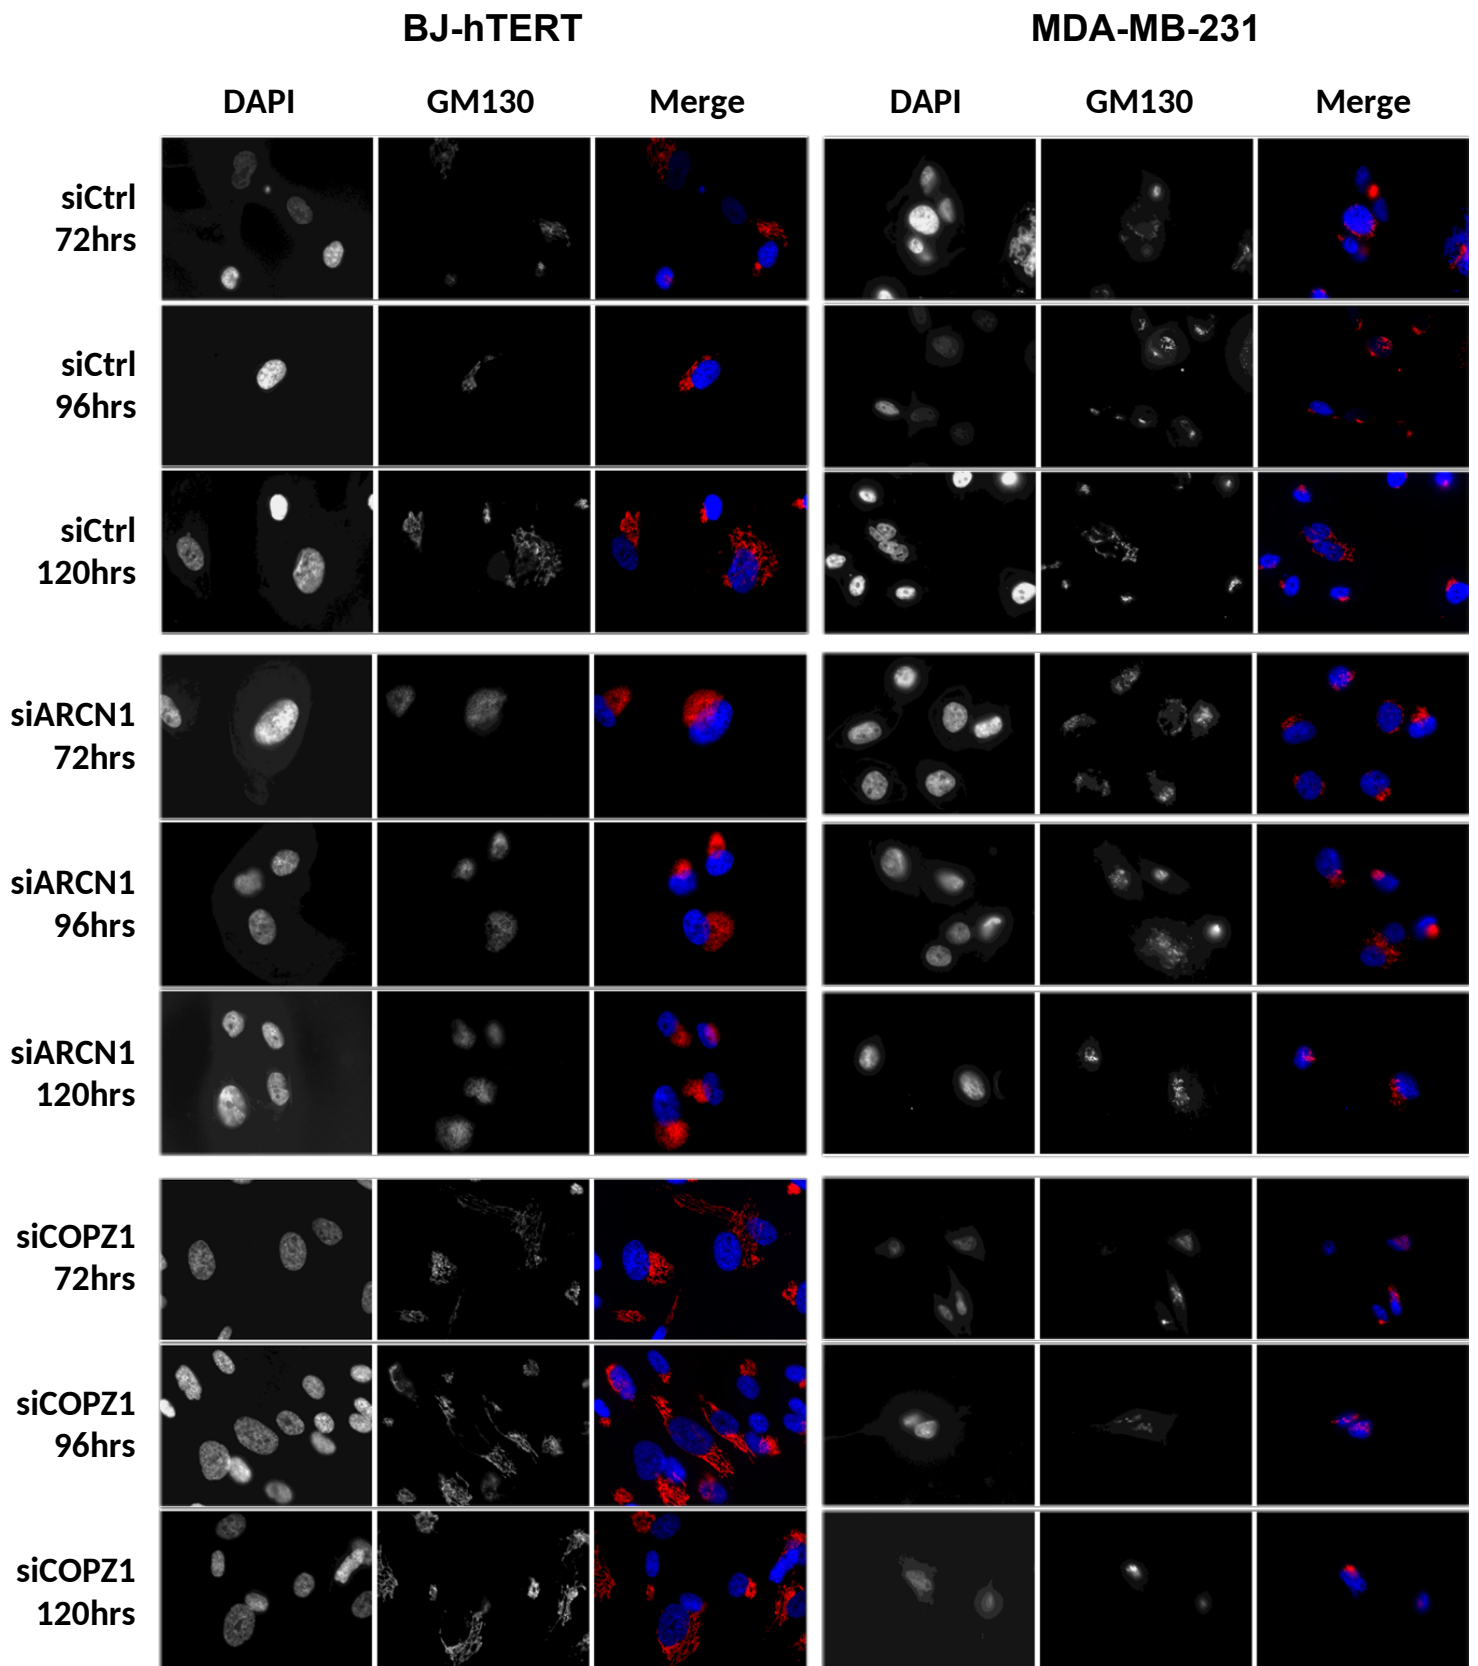

siRNA depletion with Control (top panel), ARCN1 (middle panel), or COPZ1 (bottom panel) siRNA in both BJ-hTERT (left panel) and MDA-MB-231 (right panel) monitored at 72, 96, and 120 hours post-transfection. Nuclei and Golgi were visualized with DAPI and anti-GM130 Abs respectively. Golgi disruption is seen as dispersion of GM130 staining while intact Golgi maintain tubule-like structure.

# Supplemental Figure 7: RNA expression of RPL35A, DDX24, and ARCN1

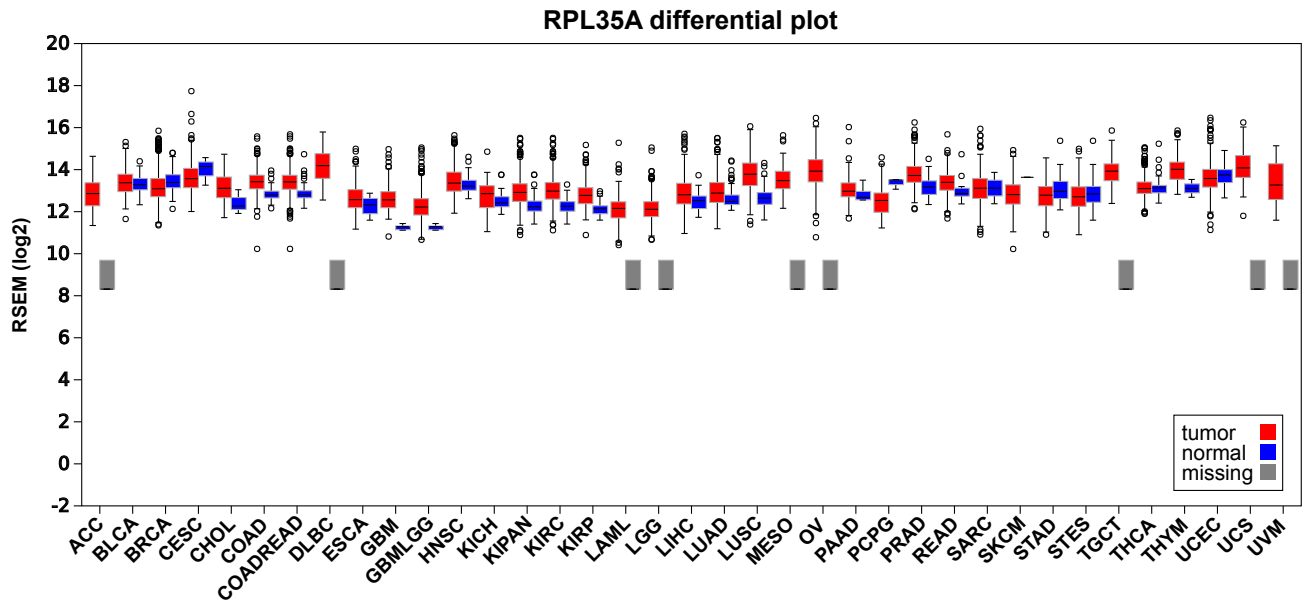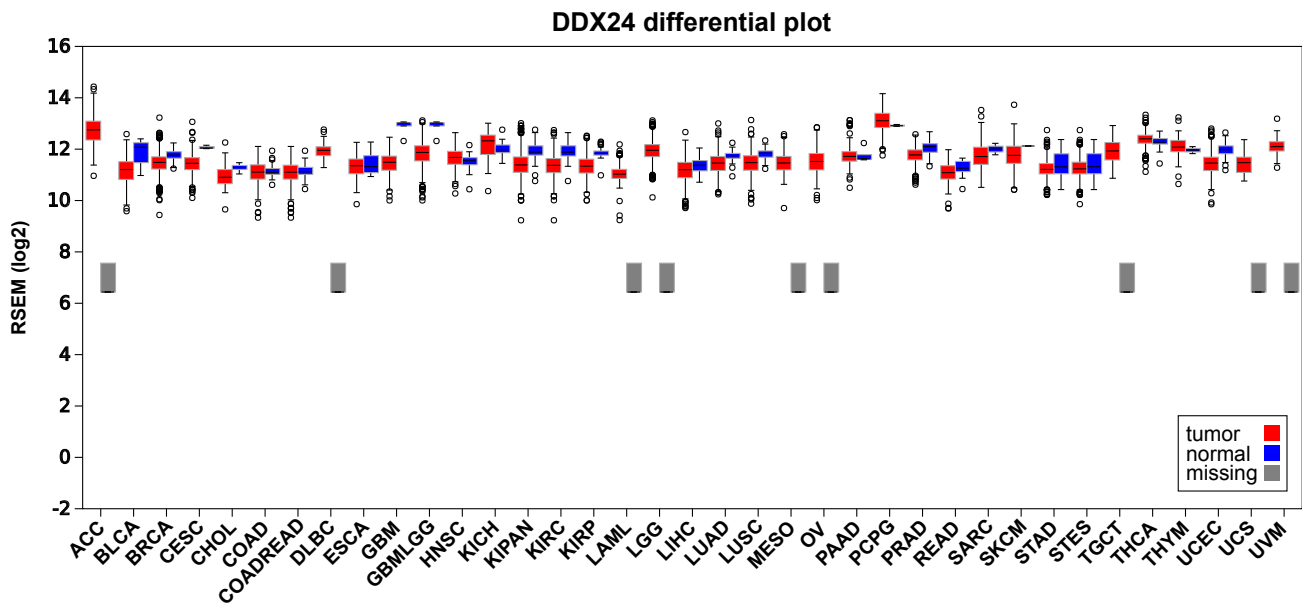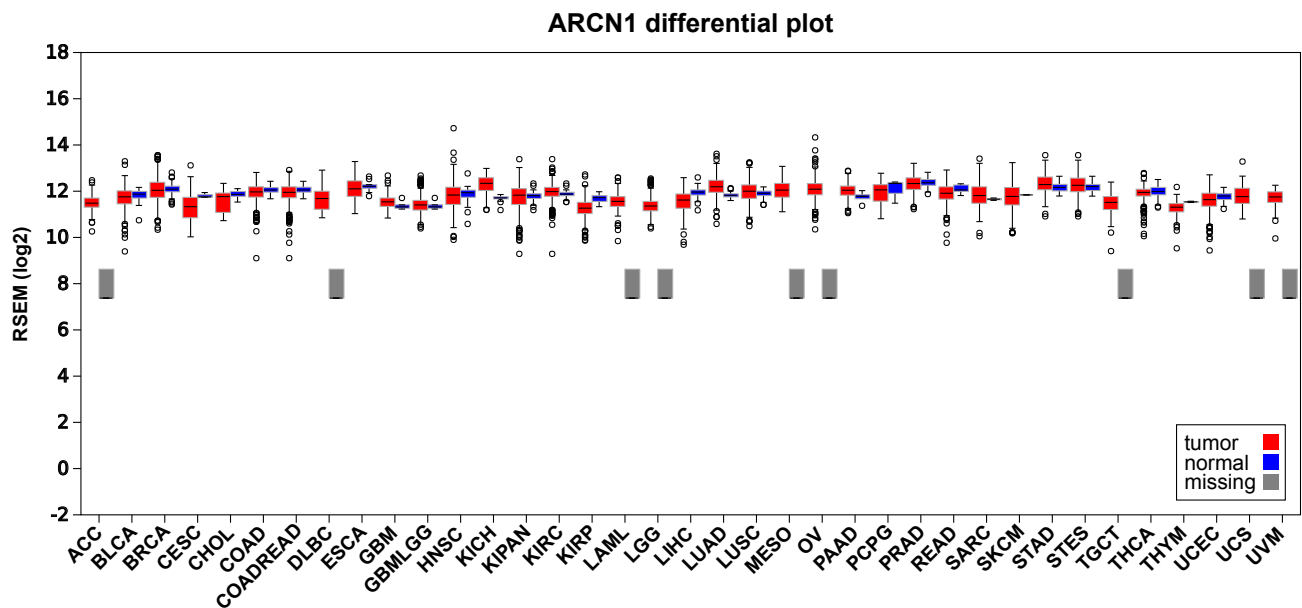

mRNA expression level of RPL35A, DDX24, and ARCN1. mRNA expression in tumor samples indicated by red box and whisker plots and corresponding normal tissue expression level indicated in blue. Missing data indicated by gray bars. Description of samples in supplemental table 9. Data obtained from TCGA.



## Description of cancer sample types for supplemental figure 7

|          |                                                                  |
|----------|------------------------------------------------------------------|
| ACC      | Adrenocortical carcinoma                                         |
| BLCA     | Bladder Urothelial Carcinoma                                     |
| BRCA     | Breast invasive carcinoma                                        |
| CESC     | Cervical squamous cell carcinoma and endocervical adenocarcinoma |
| CHOL     | Cholangiocarcinoma                                               |
| COAD     | Colon adenocarcinoma                                             |
| COADREAD | Colorectal adenocarcinoma                                        |
| DLBC     | Lymphoid Neoplasm Diffuse Large B-cell Lymphoma                  |
| ESCA     | Esophageal carcinoma                                             |
| FPPP     | FFPE Pilot Phase II                                              |
| GBM      | Glioblastoma multiforme                                          |
| GBMLGG   | Glioma                                                           |
| HNSC     | Head and Neck squamous cell carcinoma                            |
| KICH     | Kidney Chromophobe                                               |
| KIPAN    | Pan-kidney cohort (KICH+KIRC+KIRP)                               |
| KIRC     | Kidney renal clear cell carcinoma                                |
| KIRP     | Kidney renal papillary cell carcinoma                            |
| LAML     | Acute Myeloid Leukemia                                           |
| LGG      | Brain Lower Grade Glioma                                         |
| LIHC     | Liver hepatocellular carcinoma                                   |
| LUAD     | Lung adenocarcinoma                                              |
| LUSC     | Lung squamous cell carcinoma                                     |
| MESO     | Mesothelioma                                                     |
| OV       | Ovarian serous cystadenocarcinoma                                |
| PAAD     | Pancreatic adenocarcinoma                                        |
| PCPG     | Pheochromocytoma and Paraganglioma                               |
| PRAD     | Prostate adenocarcinoma                                          |
| READ     | Rectum adenocarcinoma                                            |
| SARC     | Sarcoma                                                          |
| SKCM     | Skin Cutaneous Melanoma                                          |
| STAD     | Stomach adenocarcinoma                                           |
| STES     | Stomach and Esophageal carcinoma                                 |
| TGCT     | Testicular Germ Cell Tumors                                      |
| THCA     | Thyroid carcinoma                                                |
| THYM     | Thymoma                                                          |
| UCEC     | Uterine Corpus Endometrial Carcinoma                             |
| UCS      | Uterine Carcinosarcoma                                           |
| UVM      | Uveal Melanoma                                                   |

# Supplemental Figure 8

## Figure 4B, Upper panel

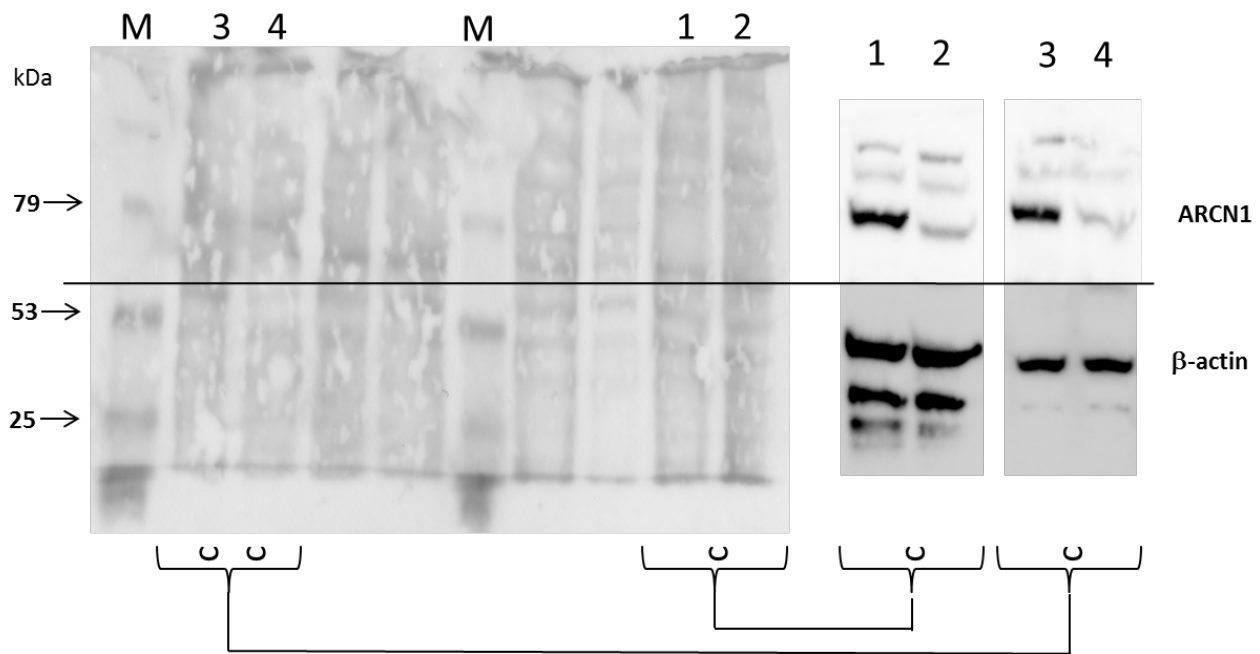

M – Precision Plus Protein™ All Blue Standards #1610373, BioRad  
Gel: 8% Self Made Laemmli SDS Gel, Tris-Glycine

## Figure 4B, Lower panel

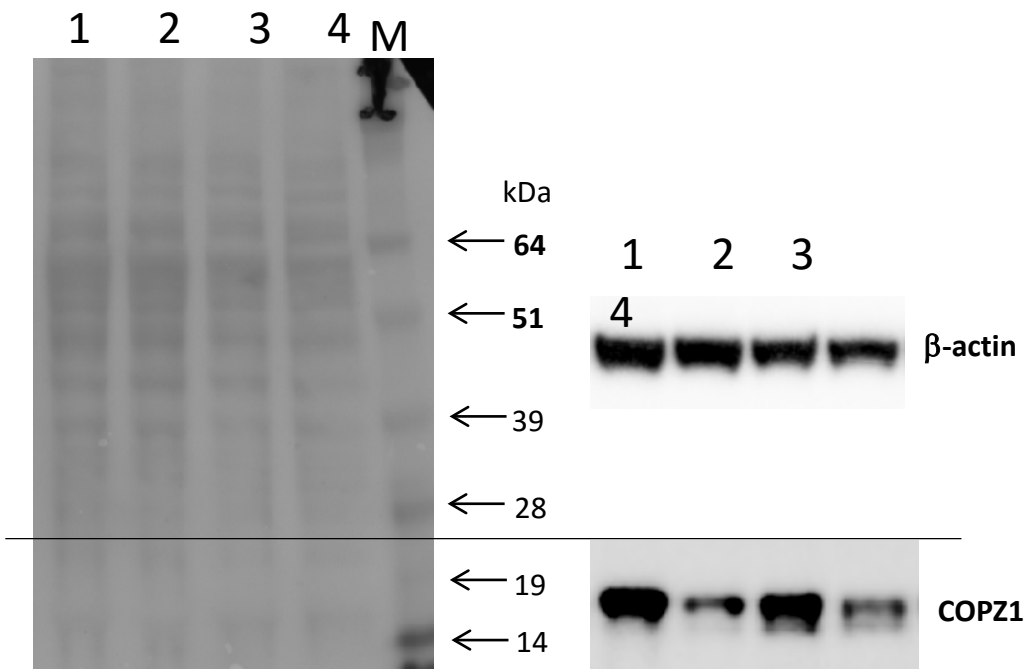

M – SeeBluePlus2 #LC5925, Thermo Scientific  
Gel: 4 – 20% precast gradient gel, MOPS, Express Plus, #M42015, Gene Script

# Supplemental Figure 8

**Figure 5C**

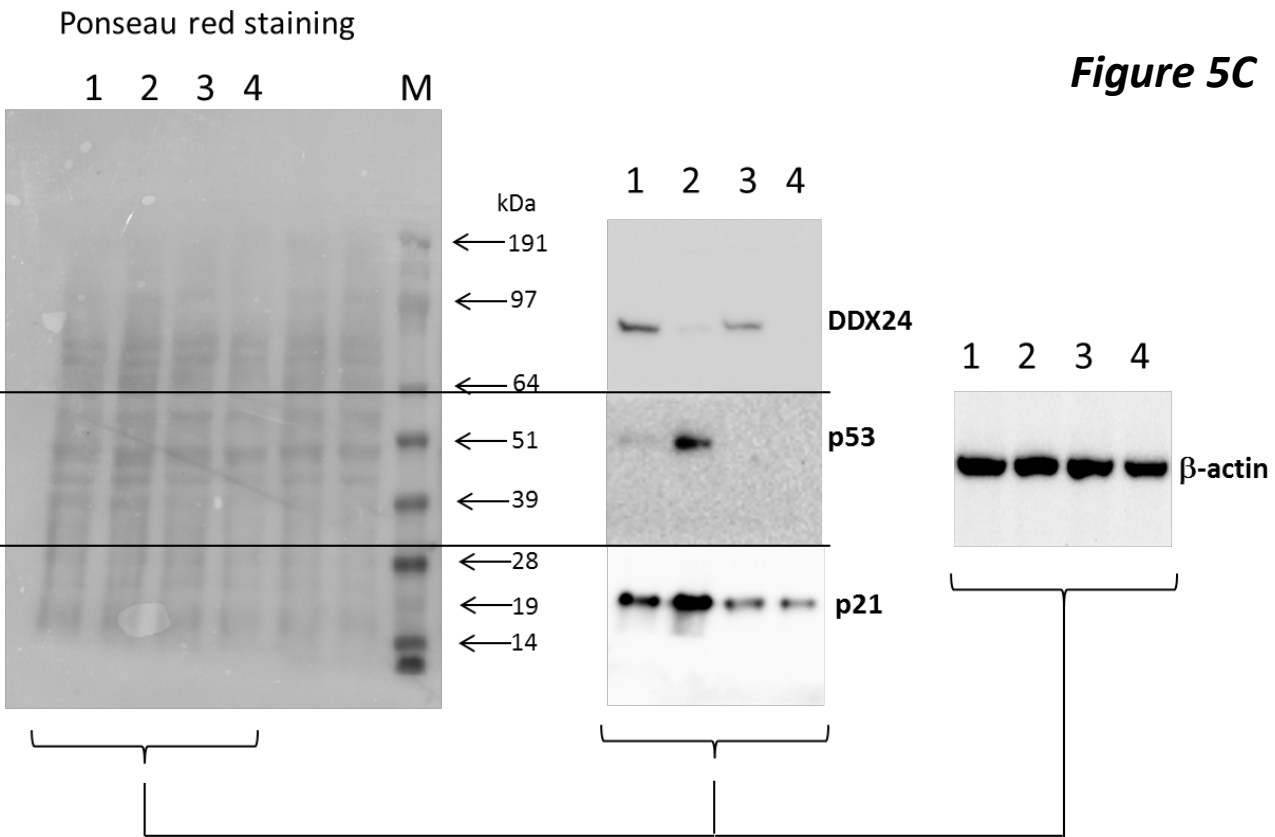

**Figure 5D**

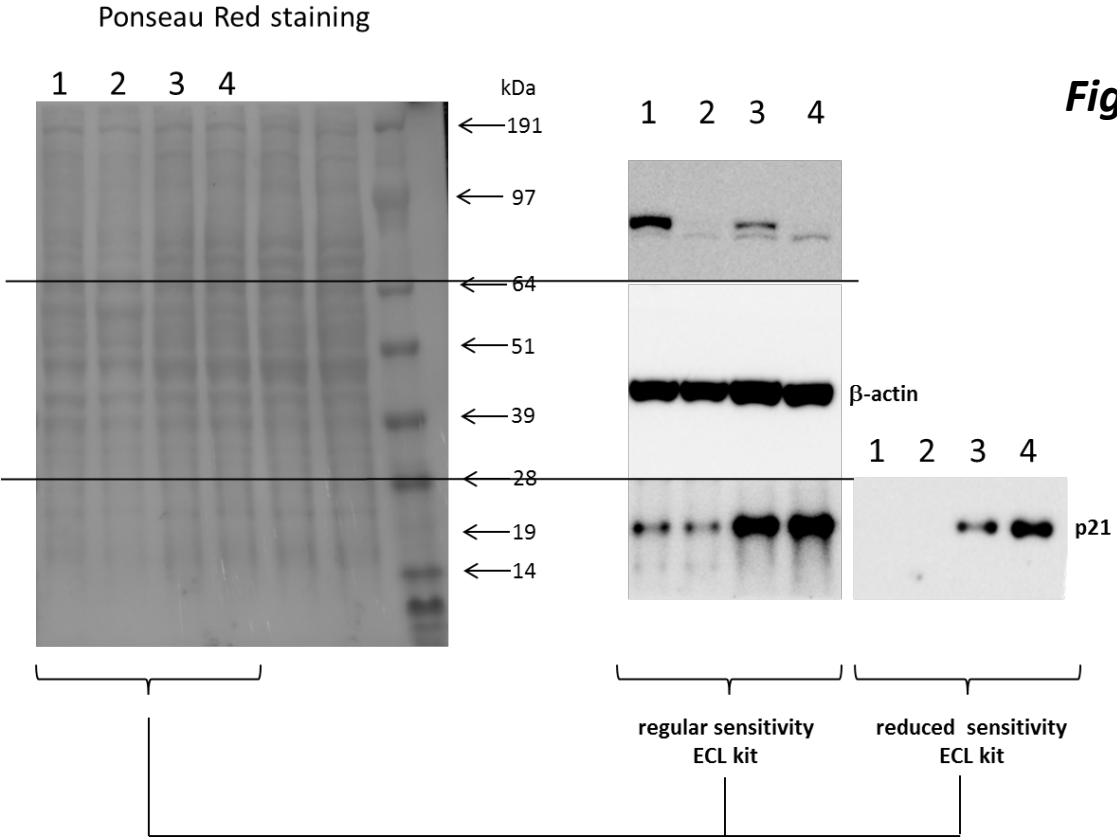

M – SeeBluePlus2 #LC5925, Thermo Scientific  
 Gel: 4 – 20% precast gradient gel, MOPS, Express Plus, #M42015, Gene Script

# Supplemental Figure 8

## Figure 6A

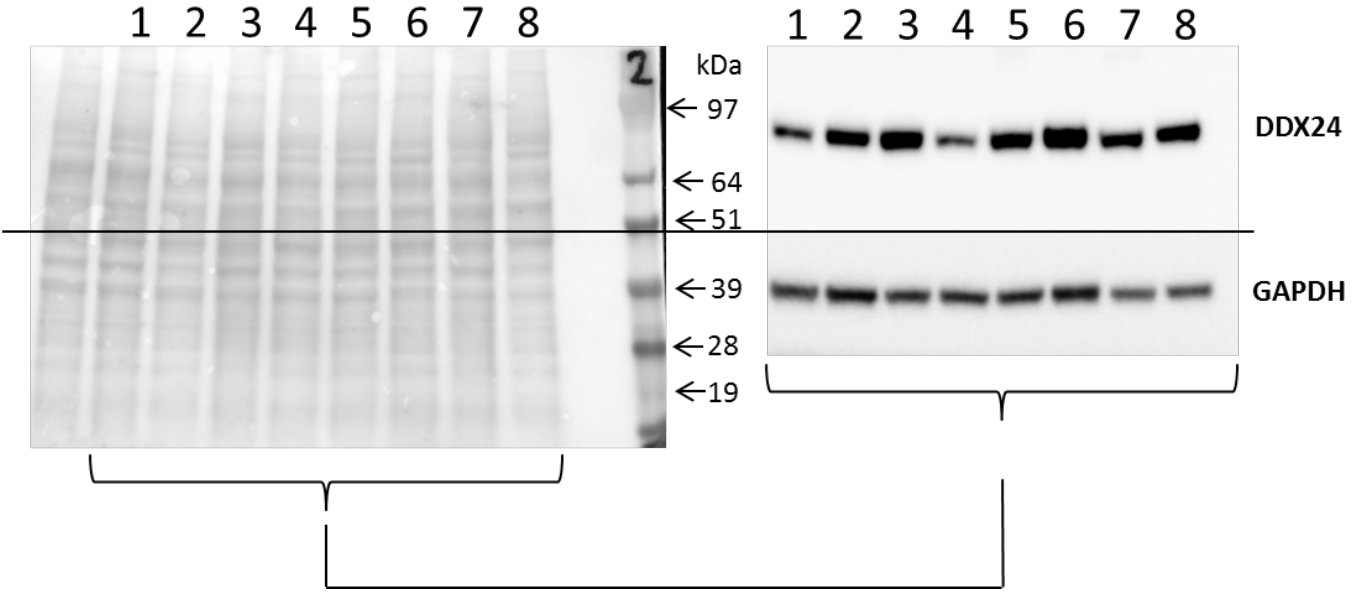

## Figure 6B

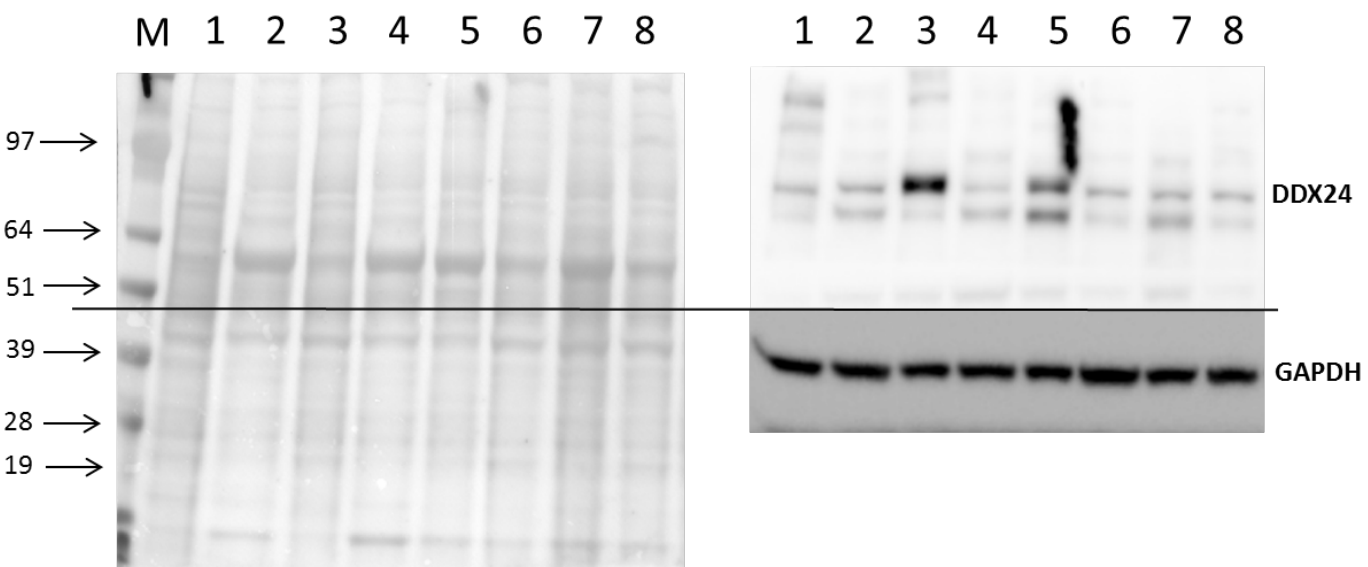

M – SeeBluePlus2 #LC5925, Thermo Scientific  
Gel: 4 – 20% precast gradient gel, MOPS, Express Plus, #M42015, Gene Script

Supplemental Tables:

Supplemental Table S1: GO analysis results for hits from GSE screen

Supplemental Table S2: GO analysis identified 18 genes involved in RNA-splicing from list of GSE hits

Supplemental Table S3: GO analysis identified 21 genes involved in protein translation from GSE hits

Supplemental Table S4: Kegg Pathway search identified 8 genes from 221 GSE hits associated with PI3K-AKT signaling

Supplementary Table S5: Genes Identified with level of evidence indicated by color legend

Supplementary Table S6: Literature references for genes associated with cancer progression

Supplementary Table S7 List of primers used for amplification of the library

Supplementary Table S8: List of individual indexes

Supplemental Table S9: Results of siRNA screening with pooled siRNAs (GE Healthcare). Data represented relative to transfection with scrambled siRNA

Supplemental DataSets:

Supplemental DataSet S1. Genes targeted by GSEs enriched in BrdU-selected subsets in 2 or more tumor cell lines.

Supplementary DataSet S2: Sequences for 1274 shRNAs targeting 216 genes from GSE screen for which unique shRNAs designed.

| Supplemental Table 1: GO analysis results for hits from GSE screen     |           |          |          |            |     |          |
|------------------------------------------------------------------------|-----------|----------|----------|------------|-----|----------|
|                                                                        | Reference | upload_1 |          |            |     |          |
| Mapped IDs:                                                            | 20814     | 179      |          |            |     |          |
| Unmapped IDs:                                                          | 0         | 4        |          |            |     |          |
| Export results                                                         |           |          |          |            |     |          |
| Displaying only results with P<0.05; click here to display all results |           |          |          |            |     |          |
|                                                                        | Homo sap  | upload_1 |          |            |     |          |
| GO biological process complete                                         | #         | #        | expected | Fold Enric | +/- | P value  |
| translational initiation                                               | 232       | 14       | 2        | > 5        | +   | 1.50E-04 |
| RNA splicing                                                           | 338       | 18       | 2.91     | > 5        | +   | 9.16E-06 |
| macromolecular complex disassemb                                       | 229       | 11       | 1.97     | > 5        | +   | 4.53E-02 |
| translation                                                            | 397       | 19       | 3.41     | > 5        | +   | 1.75E-05 |
| peptide biosynthetic process                                           | 420       | 19       | 3.61     | > 5        | +   | 4.30E-05 |
| mRNA processing                                                        | 396       | 17       | 3.41     | 4.99       | +   | 5.99E-04 |
| amide biosynthetic process                                             | 480       | 20       | 4.13     | 4.84       | +   | 6.52E-05 |
| mRNA metabolic process                                                 | 564       | 23       | 4.85     | 4.74       | +   | 6.83E-06 |
| peptide metabolic process                                              | 517       | 20       | 4.45     | 4.5        | +   | 2.19E-04 |
| RNA processing                                                         | 705       | 26       | 6.06     | 4.29       | +   | 4.09E-06 |
| cellular component disassembly                                         | 493       | 17       | 4.24     | 4.01       | +   | 1.21E-02 |
| cellular amide metabolic process                                       | 666       | 22       | 5.73     | 3.84       | +   | 6.65E-04 |
| organonitrogen compound biosynth                                       | 1007      | 28       | 8.66     | 3.23       | +   | 3.70E-04 |
| intracellular protein transport                                        | 727       | 20       | 6.25     | 3.2        | +   | 4.24E-02 |
| single-organism intracellular transpo                                  | 1168      | 30       | 10.04    | 2.99       | +   | 6.50E-04 |
| intracellular transport                                                | 1353      | 32       | 11.64    | 2.75       | +   | 1.45E-03 |
| cellular protein localization                                          | 1138      | 26       | 9.79     | 2.66       | +   | 4.42E-02 |
| cellular macromolecule localization                                    | 1146      | 26       | 9.86     | 2.64       | +   | 5.00E-02 |
| establishment of localization in cell                                  | 1812      | 39       | 15.58    | 2.5        | +   | 6.13E-04 |
| protein localization                                                   | 1689      | 35       | 14.53    | 2.41       | +   | 7.89E-03 |
| cellular localization                                                  | 2174      | 45       | 18.7     | 2.41       | +   | 1.48E-04 |
| gene expression                                                        | 3825      | 77       | 32.89    | 2.34       | +   | 1.98E-10 |
| macromolecule localization                                             | 2013      | 40       | 17.31    | 2.31       | +   | 3.27E-03 |
| cellular response to stress                                            | 1718      | 34       | 14.77    | 2.3        | +   | 3.18E-02 |
| macromolecular complex subunit or                                      | 2074      | 39       | 17.84    | 2.19       | +   | 1.84E-02 |
| cellular nitrogen compound metabo                                      | 5112      | 91       | 43.96    | 2.07       | +   | 2.75E-10 |
| RNA metabolic process                                                  | 3373      | 60       | 29.01    | 2.07       | +   | 8.25E-05 |
| cellular nitrogen compound biosynth                                    | 3407      | 60       | 29.3     | 2.05       | +   | 1.20E-04 |
| organelle organization                                                 | 2912      | 51       | 25.04    | 2.04       | +   | 2.75E-03 |
| nitrogen compound metabolic proce                                      | 5475      | 95       | 47.08    | 2.02       | +   | 2.15E-10 |
| cellular macromolecule biosynthetic                                    | 3576      | 62       | 30.75    | 2.02       | +   | 1.10E-04 |
| nucleic acid metabolic process                                         | 3874      | 66       | 33.32    | 1.98       | +   | 5.78E-05 |
| macromolecule biosynthetic process                                     | 3651      | 62       | 31.4     | 1.97       | +   | 2.44E-04 |
| cellular component organization                                        | 5066      | 85       | 43.57    | 1.95       | +   | 1.22E-07 |
| cellular component organization or b                                   | 5188      | 87       | 44.62    | 1.95       | +   | 5.70E-08 |
| nucleobase-containing compound m                                       | 4372      | 72       | 37.6     | 1.91       | +   | 3.34E-05 |
| heterocycle metabolic process                                          | 4573      | 75       | 39.33    | 1.91       | +   | 1.49E-05 |
| cellular aromatic compound metabo                                      | 4575      | 74       | 39.34    | 1.88       | +   | 3.90E-05 |

|                                      |       |     |        |      |   |          |
|--------------------------------------|-------|-----|--------|------|---|----------|
| cellular biosynthetic process        | 4493  | 72  | 38.64  | 1.86 | + | 1.11E-04 |
| organic cyclic compound metabolic p  | 4818  | 76  | 41.43  | 1.83 | + | 6.49E-05 |
| organic substance biosynthetic proce | 4587  | 72  | 39.45  | 1.83 | + | 2.69E-04 |
| biosynthetic process                 | 4673  | 72  | 40.19  | 1.79 | + | 5.91E-04 |
| cellular macromolecule metabolic pr  | 6753  | 103 | 58.08  | 1.77 | + | 3.58E-08 |
| macromolecule metabolic process      | 7438  | 111 | 63.97  | 1.74 | + | 6.46E-09 |
| localization                         | 4683  | 67  | 40.27  | 1.66 | + | 3.58E-02 |
| organic substance metabolic process  | 9008  | 124 | 77.47  | 1.6  | + | 1.53E-08 |
| cellular metabolic process           | 8573  | 118 | 73.73  | 1.6  | + | 1.71E-07 |
| primary metabolic process            | 8697  | 118 | 74.79  | 1.58 | + | 5.07E-07 |
| metabolic process                    | 9928  | 132 | 85.38  | 1.55 | + | 9.47E-09 |
| cellular process                     | 14147 | 156 | 121.66 | 1.28 | + | 1.90E-05 |
| biological_process                   | 16542 | 170 | 142.26 | 1.19 | + | 2.91E-05 |
| Unclassified                         | 4272  | 9   | 36.74  | 0.24 | - | 0.00E+00 |

Supplemental Table 2: GO analysis identified 18 genes involved in RNA-splicing from list of GSE hits

| Gene ID                                 | Mapped IDs | Gene Name                                               | PANTHER Family/Subfamily                                                  | PANTHER Protein Class  |
|-----------------------------------------|------------|---------------------------------------------------------|---------------------------------------------------------------------------|------------------------|
| 1<br>HUMAN HGNC=8014 UniProtKB=P67809   | YBX1       | Nuclease-sensitive element-binding protein 1            | NUCLEASE-SENSITIVE ELEMENT-BINDING PROTEIN 1 (PTHR11544:SF68)             | -                      |
| 2<br>HUMAN HGNC=17066 UniProtKB=Q9UKV3  | ACIN1      | Apoptotic chromatin condensation inducer in the nucleus | APOPTOTIC CHROMATIN CONDENSATION INDUCER IN THE NUCLEUS (PTHR10799:SF637) | DNA helicase           |
| 3<br>HUMAN HGNC=11161 UniProtKB=P62304  | SNRPE      | Small nuclear ribonucleoprotein E                       | SMALL NUCLEAR RIBONUCLEOPROTEIN E (PTHR11193:SF2)                         | mRNA splicing factor   |
| 4<br>HUMAN HGNC=23136 UniProtKB=Q9BWG6  | SCNM1      | Sodium channel modifier 1                               | SODIUM CHANNEL MODIFIER 1 (PTHR32297:SF1)                                 | -                      |
| 5<br>HUMAN HGNC=9188 UniProtKB=P30876   | POLR2B     | DNA-directed RNA polymerase II subunit RPB2             | DNA-DIRECTED RNA POLYMERASE II SUBUNIT RPB2 (PTHR20856:SF7)               | nucleotidyltransferase |
| 6<br>HUMAN HGNC=11155 UniProtKB=P08579  | SNRPB2     | U2 small nuclear ribonucleoprotein B''                  | U2 SMALL NUCLEAR RIBONUCLEOPROTEIN B'' (PTHR10501:SF21)                   | mRNA splicing factor   |
| 7<br>HUMAN HGNC=23169 UniProtKB=Q9Y224  | C14orf166  | UPF0568 protein C14orf166                               | UPF0568 PROTEIN C14ORF166 (PTHR15924:SF9)                                 | -                      |
| 8<br>HUMAN HGNC=14245 UniProtKB=O95149  | SNUPN      | Snurportin-1                                            | SNURPORTIN-1 (PTHR13403:SF6)                                              | -                      |
| 9<br>HUMAN HGNC=10768 UniProtKB=O75533  | SF3B1      | Splicing factor 3B subunit 1                            | SPLICING FACTOR 3B SUBUNIT 1 (PTHR12097:SF0)                              | mRNA splicing factor   |
| 10<br>HUMAN HGNC=16939 UniProtKB=O95391 | SLU7       | Pre-mRNA-splicing factor SLU7                           | PRE-MRNA-SPLICING FACTOR SLU7 (PTHR12942:SF2)                             | mRNA splicing factor   |
| 11<br>HUMAN HGNC=2746 UniProtKB=P17844  | DDX5       | Probable ATP-dependent RNA helicase DDX5                | ATP-DEPENDENT RNA HELICASE DDX5-RELATED (PTHR24031:SF219)                 | RNA helicase           |
| 12<br>HUMAN HGNC=16463 UniProtKB=O75400 | PRPF40A    | Pre-mRNA-processing factor 40 homolog A                 | PRE-MRNA-PROCESSING FACTOR 40 HOMOLOG A (PTHR11864:SF20)                  | -                      |



|    |                                   |         |                                                     |                                                                     |                                     |
|----|-----------------------------------|---------|-----------------------------------------------------|---------------------------------------------------------------------|-------------------------------------|
| 13 | HUMAN HGNC=24217 UniProtKB=Q86X95 | CIR1    | Corepressor interacting with RBPJ 1                 | COREPRESSOR INTERACTING WITH RBPJ 1 (PTHR13151:SF2)                 | -                                   |
| 14 | HUMAN HGNC=5041 UniProtKB=P31943  | HNRNPH1 | Heterogeneous nuclear ribonucleoprotein H           | HETEROGENEOUS NUCLEAR RIBONUCLEOPROTEIN H (PTHR13976:SF34)          | ribosomal protein                   |
| 15 | HUMAN HGNC=13058 UniProtKB=O95218 | ZRANB2  | Zinc finger Ran-binding domain-containing protein 2 | ZINC FINGER RAN-BINDING DOMAIN-CONTAINING PROTEIN 2 (PTHR12999:SF7) | -                                   |
| 16 | HUMAN HGNC=17162 UniProtKB=Q9Y4Y9 | LSM5    | U6 snRNA-associated Sm-like protein LSm5            | U6 SNRNA-ASSOCIATED SM-LIKE PROTEIN LSM5 (PTHR20971:SF0)            | mRNA splicing factor                |
| 17 | HUMAN HGNC=23244 UniProtKB=P49756 | RBM25   | RNA-binding protein 25                              | RNA-BINDING PROTEIN 25 (PTHR18806:SF4)                              | RNA binding protein                 |
| 18 | HUMAN HGNC=10530 UniProtKB=O00422 | SAP18   | Histone deacetylase complex subunit SAP18           | HISTONE DEACETYLASE COMPLEX SUBUNIT SAP18 (PTHR13082:SF0)           | chromatin/chromatin-binding protein |

Supplemental Table 3: GO analysis identified 21 genes involved in protein translation from GSE hits

| Gene ID                           | Mapped IDs | Gene Name                                         | PANTHER Family/Subfamily                                    | PANTHER Protein Class         |
|-----------------------------------|------------|---------------------------------------------------|-------------------------------------------------------------|-------------------------------|
| HUMAN HGNC=17718 UniProtKB=P67812 | SEC11A     | Signal peptidase complex catalytic subunit SEC11A | SIGNAL PEPTIDASE COMPLEX CATALYTIC SUBUNIT SEC11A           | -                             |
| HUMAN HGNC=3285 UniProtKB=P23588  | EIF4B      | Eukaryotic translation initiation factor 4B       | EUKARYOTIC TRANSLATION INITIATION FACTOR 4B (PTHR23236:SF2) | translation initiation factor |
| HUMAN HGNC=10316 UniProtKB=P62829 | RPL23      | 60S ribosomal protein L23                         | 60S RIBOSOMAL PROTEIN L23 (PTHR11761:SF8)                   | ribosomal protein             |
| HUMAN HGNC=11325 UniProtKB=Q9UNL2 | SSR3       | Translocon-associated protein subunit gamma       | TRANSLOCON-ASSOCIATED PROTEIN SUBUNIT GAMMA (PTHR13399:SF2) | -                             |
| HUMAN HGNC=14480 UniProtKB=Q9NWU5 | MRPL22     | 39S ribosomal protein L22, mitochondrial          | 39S RIBOSOMAL PROTEIN L22, MITOCHONDRIAL (PTHR13501:SF2)    | ribosomal protein             |
| HUMAN HGNC=26121 UniProtKB=Q96EI5 | TCEAL4     | Transcription elongation factor A protein-like 4  | TRANSCRIPTION ELONGATION FACTOR A PROTEIN-LIKE 4            | transcription factor          |
| HUMAN HGNC=11330 UniProtKB=P30872 | SSR1       | Somatostatin receptor type 1                      | SOMATOSTATIN RECEPTOR TYPE 1 (PTHR24229:SF38)               | G-protein coupled receptor    |
| HUMAN HGNC=3254 UniProtKB=Q9BY44  | EIF2A      | Eukaryotic translation initiation factor 2A       | EUKARYOTIC TRANSLATION INITIATION FACTOR 2A (PTHR13227:SF0) | translation initiation factor |
| HUMAN HGNC=23357 UniProtKB=Q9ULC4 | MCTS1      | Malignant T-cell-amplified sequence 1             | MALIGNANT T-CELL-AMPLIFIED SEQUENCE 1 (PTHR22798:SF0)       | receptor                      |
| HUMAN HGNC=14049 UniProtKB=O60783 | MRPS14     | 28S ribosomal protein S14, mitochondrial          | 28S RIBOSOMAL PROTEIN S14, MITOCHONDRIAL (PTHR19836:SF19)   | ribosomal protein             |
| HUMAN HGNC=11332 UniProtKB=P32745 | SSR3       | Somatostatin receptor type 3                      | SOMATOSTATIN RECEPTOR TYPE 3 (PTHR24229:SF42)               | G-protein coupled receptor    |
| HUMAN HGNC=10345 UniProtKB=P18077 | RPL35A     | 60S ribosomal protein L35a                        | 60S RIBOSOMAL PROTEIN L35A (PTHR10902:SF2)                  | ribosomal protein             |
| HUMAN HGNC=2240 UniProtKB=Q92905  | COPS5      | COP9 signalosome complex subunit 5                | COP9 SIGNALOSOME COMPLEX SUBUNIT 5 (PTHR10410:SF6)          | transcription factor          |
| HUMAN HGNC=11323 UniProtKB=P43307 | SSR1       | Translocon-associated protein subunit alpha       | TRANSLOCON-ASSOCIATED PROTEIN SUBUNIT ALPHA (PTHR12924:SF1) | membrane traffic protein      |

|                                   |        |                                                     |                                                                 |                     |
|-----------------------------------|--------|-----------------------------------------------------|-----------------------------------------------------------------|---------------------|
| HUMAN HGNC=26274 UniProtKB=Q96I59 | NARS2  | Probable asparagine--tRNA ligase, mitochondrial     | ASPARAGINE--TRNA LIGASE, MITOCHONDRIAL-RELATED (PTHR22594:SF34) | RNA binding protein |
| HUMAN HGNC=10301 UniProtKB=P62913 | RPL11  | 60S ribosomal protein L11                           | 60S RIBOSOMAL PROTEIN L11 (PTHR11994:SF12)                      | ribosomal protein   |
| HUMAN HGNC=16945 UniProtKB=Q9H074 | PAIP1  | Polyadenylate-binding protein-interacting protein 1 | POLYADENYLATE-BINDING PROTEIN-INTERACTING PROTEIN 1             | RNA binding protein |
| HUMAN HGNC=14513 UniProtKB=Q9Y2Q9 | MRPS28 | 28S ribosomal protein S28, mitochondrial            | 28S RIBOSOMAL PROTEIN S28, MITOCHONDRIAL (PTHR13447:SF2)        | -                   |
| HUMAN HGNC=14512 UniProtKB=Q92552 | MRPS27 | 28S ribosomal protein S27, mitochondrial            | 28S RIBOSOMAL PROTEIN S27, MITOCHONDRIAL (PTHR21393:SF0)        | ribosomal protein   |
| HUMAN HGNC=16635 UniProtKB=P82673 | MRPS35 | 28S ribosomal protein S35, mitochondrial            | 28S RIBOSOMAL PROTEIN S35, MITOCHONDRIAL (PTHR13490:SF0)        | ribosomal protein   |
| HUMAN HGNC=14493 UniProtKB=Q9Y6G3 | MRPL42 | 39S ribosomal protein L42, mitochondrial            | 39S RIBOSOMAL PROTEIN L42, MITOCHONDRIAL (PTHR13450:SF1)        | ribosomal protein   |

Supplementary Table 4: Kegg Pathway search identified 8 genes from 221 GSE hits associated with PI3K-AKT signaling

| Gene Symbol | Gene Info                                                    | KEGG Pathway Title                                                                                                                                                                                                                                                                                                                                                                                                                                                                                                                                                                                                                                                                                                                                                                                                                                                                                                                              |
|-------------|--------------------------------------------------------------|-------------------------------------------------------------------------------------------------------------------------------------------------------------------------------------------------------------------------------------------------------------------------------------------------------------------------------------------------------------------------------------------------------------------------------------------------------------------------------------------------------------------------------------------------------------------------------------------------------------------------------------------------------------------------------------------------------------------------------------------------------------------------------------------------------------------------------------------------------------------------------------------------------------------------------------------------|
| EIF4B       | eukaryotic translation initiation factor 4B                  | PI3K-Akt signaling pathway; RNA transport; mTOR signaling pathway; Proteoglycans in cancer                                                                                                                                                                                                                                                                                                                                                                                                                                                                                                                                                                                                                                                                                                                                                                                                                                                      |
| RHEB        | Ras homolog enriched in brain                                | PI3K-Akt signaling pathway; mTOR signaling pathway; Thyroid hormone signaling pathway; AMPK signaling pathway; Insulin signaling pathway; Choline metabolism in cancer                                                                                                                                                                                                                                                                                                                                                                                                                                                                                                                                                                                                                                                                                                                                                                          |
| GRB2        | growth factor receptor-bound protein 2                       | PI3K-Akt signaling pathway; MAPK signaling pathway; Osteoclast differentiation; Choline metabolism in cancer; Chemokine signaling pathway; Dorso-ventral axis formation; Alcoholism; Pathways in cancer; Chronic myeloid leukemia; Focal adhesion; Fc epsilon RI signaling pathway; Insulin signaling pathway; Hepatitis C; Acute myeloid leukemia; Ras signaling pathway; Gap junction; T cell receptor signaling pathway; B cell receptor signaling pathway; Proteoglycans in cancer; Renal cell carcinoma; Non-small cell lung cancer; Jak-STAT signaling pathway; GnRH signaling pathway; Glioma; Prostate cancer; Signaling pathways regulating pluripotency of stem cells; Prolactin signaling pathway; Viral carcinogenesis; Endometrial cancer; ErbB signaling pathway; FoxO signaling pathway; Natural killer cell mediated cytotoxicity; Neurotrophin signaling pathway; Estrogen signaling pathway; Hepatitis B; MicroRNAs in cancer |
| IL2RG       | interleukin 2 receptor, gamma                                | PI3K-Akt signaling pathway; Cytokine-cytokine receptor interaction; Endocytosis; Jak-STAT signaling pathway; Measles; HTLV-I infection; Inflammatory bowel disease (IBD); Primary immunodeficiency                                                                                                                                                                                                                                                                                                                                                                                                                                                                                                                                                                                                                                                                                                                                              |
| HSP90AB1    | heat shock protein 90kDa alpha (cytosolic), class B member 1 | PI3K-Akt signaling pathway; Protein processing in endoplasmic reticulum; NOD-like receptor signaling pathway; Progesterone-mediated oocyte maturation; Prostate cancer; Antigen processing and presentation; Pathways in cancer; Estrogen signaling pathway                                                                                                                                                                                                                                                                                                                                                                                                                                                                                                                                                                                                                                                                                     |

|      |                                    |                                                                                                                                                                           |
|------|------------------------------------|---------------------------------------------------------------------------------------------------------------------------------------------------------------------------|
| SPP1 | secreted phosphoprotein 1          | PI3K-Akt signaling pathway; Toll-like receptor signaling pathway; Focal adhesion; ECM-receptor interaction                                                                |
| DCN  | decorin                            | PI3K-Akt signaling pathway; Proteoglycans in cancer; TGF-beta signaling pathway                                                                                           |
| CD44 | CD44 molecule (Indian blood group) | PI3K-Akt signaling pathway; ECM-receptor interaction; Hematopoietic cell lineage; Epstein-Barr virus infection; Proteoglycans in cancer; MicroRNAs in cancer; Shigellosis |

Supplementary Table 5: Genes Identified with level of evidence indicated by color legend

**Color Legend**

Greater than 0 in all 4 cell lines

Greater than 0 in 3 of 4 cell lines

Greater than 0 in 2 of 4 cell lines

Greater than 0.1 in 1 of 4 cell lines

| Gene_ID   | Gene_Name                                         | HCT116-Lrstat | HCT116-Slope | HT1080-Lrstat | HT1080-Slope | MDA-Lrstat | MDA-Slope | PC3-Lrstat | PC3-Slope | BJ-Slope |
|-----------|---------------------------------------------------|---------------|--------------|---------------|--------------|------------|-----------|------------|-----------|----------|
| ARCN1     | Coatomer subunit delta                            | 0.12861       | -81.542      | 0.03          | -46.192      | 0.080138   | -68.6417  | 0.00137    | -18.1417  | -10.2583 |
| HMGB1     | High mobility group protein B1                    | 0.00194       | -63.017      | 0.0105        | -76.825      | 0.004052   | -66.75    | 0.906342   | -244.908  | 54.73333 |
| LOC644100 | -                                                 | 0.02246       | -112.82      | 0.0243        | -118.23      | 8.25E-05   | -67.5167  | 0.001175   | -76.1583  | -64.525  |
| RABIF     | Guanine nucleotide exchange factor MSS4           | 0.2235        | -143.05      | 0.4111        | -205.42      | 0.128671   | -111.825  | 0.00897    | -43.975   | 15.4     |
| SARNP     | SAP domain-containing ribonucleoprotein           | 0.01252       | -63.458      | 0.0093        | -58.958      | 0.044519   | -101.917  | 0.3096     | -231.533  | 19.25833 |
| SEN7      | Sentrin-specific protease 7                       | 0.15227       | -62.733      | 0.0308        | -33.45       | 0.609844   | -124.05   | 3.370883   | -301.692  | -0.79167 |
| AGFG1     | Arf-GAP domain and FG repeat-containing protein 1 | 0             | 41.9917      | 0.0569        | -68.042      | 0.002876   | -31.175   | 0.02382    | -50.5     | 20.075   |
| ATP6V1E1  | V-type proton ATPase subunit E 1                  | 0             | -94.475      | 0.0033        | -128.09      | 0.048077   | -170.95   | 0.059616   | -179.742  | -111.725 |
| CORO1C    | Coronin-1C                                        | 0             | -21.358      | 0.0428        | -110.15      | 0.052586   | -113.55   | 0.016183   | -85.5083  | 46.21667 |
| HNRNPH1   | Heterogeneous nuclear ribonucleoprotein H         | 0             | -18.25       | 0.1195        | -169.58      | 0.051106   | -126.225  | 0.398095   | -245.708  | 60.725   |
| IL2RG     | Cytokine receptor common subunit gamma            | 0.00508       | -48.35       | 0             | 15.275       | 1.235997   | -277.542  | 0.022652   | -67.5417  | -31.9167 |

|              |                                              |         |         |        |         |          |          |          |          |          |
|--------------|----------------------------------------------|---------|---------|--------|---------|----------|----------|----------|----------|----------|
| KLHDC8A      | Kelch domain-containing protein 8A           | 0       | 12.0917 | 0.0618 | -57.433 | 0.308127 | -115.467 | 0.611858 | -166.4   | -5.9     |
| PRPF40A      | Pre-mRNA-processing factor 40 homolog A      | 0.02839 | -112.96 | 0.0199 | -108.85 | 0        | 78.8     | 0.052754 | -128.308 | 73.66667 |
| SETD5        | SET domain-containing protein 5              | 0       | -0.9083 | 0.0997 | -121.23 | 0.048413 | -98.1917 | 0.015317 | -80.7083 | 56.46667 |
| UTP11L       | U3 small nucleolar RNA-associated protein 11 | 0       | 19.3    | 0.0536 | -67.25  | 0.006658 | -30.075  | 0.070815 | -80.1167 | -8.33333 |
| AGBL1        | Cytosolic carboxypeptidase 4                 | 0       | 8.38333 | 0.1953 | -128.97 | 0        | 75.64167 | 0.655649 | -207.708 | 34.66667 |
| COPZ1        | Coatomer subunit zeta-1                      | 0.00058 | -51.392 | 0      | 16.4333 | 0.024606 | -82.2667 | 0        | -36.95   | 45.69167 |
| DDX24        | ATP-dependent RNA helicase DDX24             | 0       | -2.425  | 0      | 452.775 | 0.020173 | -63.4083 | 0.131735 | -160.733 | -7.79167 |
| EIF4B        | Eukaryotic translation initiation factor 4B  | 0       | -20.433 | 0.2248 | -224.97 | 0.030773 | -140.725 | 0        | 3.875    | 96.79167 |
| GRB2         | Growth factor receptor-bound protein 2       | 0       | -32.317 | 0.0077 | -59.525 | 0.231014 | -167.85  | 0        | -24.7    | -34.8917 |
| KCTD1        | BTB/POZ domain-containing protein KCTD1      | 0.09771 | -62.683 | 0      | 47.85   | 0        | -2.18333 | 0.046891 | -47.8167 | -8.43333 |
| LOC100505894 | -                                            | 0.01508 | -41.767 | 0      | 31.7083 | 0        | 4.866667 | 0.011925 | -41.5083 | -24.6167 |
| LOC727919    | -                                            | 0       | 63.875  | 0      | 228.158 | 0.000131 | -94.275  | 0.06875  | -166.933 | -91.1917 |
| NIT2         | Omega-amidase NIT2                           | 0       | 91.9167 | 0.2658 | -123.62 | 0        | 111.25   | 0.001222 | -9.425   | -1.325   |
| OCIAD2       | OClA domain-containing protein 2             | 0       | -75.775 | 0      | -88.308 | 0.016999 | -163.383 | 0.110477 | -220.183 | -129.2   |
| OXR1         | Serine/threonine-protein kinase OSR1         | 0       | -21.417 | 0      | 180.025 | 0.000434 | -121.7   | 0.02293  | -169.583 | 114.3667 |

|          |                                                         |         |         |        |         |          |          |          |          |          |
|----------|---------------------------------------------------------|---------|---------|--------|---------|----------|----------|----------|----------|----------|
| PDIA3    | Protein disulfide-isomerase A3                          | 0       | 16.9167 | 0      | 15.875  | 0.3885   | -141.592 | 0.126365 | -106.042 | -44.5167 |
| PLEKHA7  | Pleckstrin homology domain-containing family A member 7 | 0       | -23.642 | 0.1224 | -119.34 | 0.007987 | -67.5833 | 0        | -16.95   | -49.0833 |
| RPL35A   | 60S ribosomal protein L35a                              | 0.08467 | -117.84 | 0      | 45.9583 | 0.316173 | -161.517 | 0        | -36.8917 | -65.2083 |
| RPL36AP7 | -                                                       | 0.10976 | -81.342 | 0      | 232.117 | 0        | 31.18333 | 9.70E-05 | -7.31667 | -4.96667 |
| SLC25A35 | Solute carrier family 25 member 35                      | 0       | 250.942 | 0      | 397     | 0.031912 | -63.5417 | 0.504695 | -208.875 | 18.675   |
| SORBS2   | Sorbin and SH3 domain-containing protein 2              | 0       | -13.192 | 0.0244 | -69.05  | 0.000502 | -27.1833 | 0        | 6.666667 | -20.1417 |
| TERF2IP  | Telomeric repeat-binding factor 2-interacting protein 1 | 0.00021 | -10.708 | 0      | 36.8083 | 0        | 62.7     | 0.018244 | -46.2917 | 6.566667 |
| XPO5     | Exportin-5                                              | 0       | -5.1    | 0.0204 | -42.908 | 0.109217 | -67.9333 | 0        | 24.50833 | -10.8833 |
| ATRX     | Transcriptional regulator ATRX                          | 0       | 66.2    | 0.1794 | -79.358 | 0        | 153.8167 | 0        | 91.38333 | 25.775   |
| CDC26P1  | -                                                       | 0       | -9.3583 | 0      | 40.425  | 0        | 3.275    | 0.112387 | -125.758 | -34.1583 |
| LSM5     | U6 snRNA-associated Sm-like protein LSM5                | 0       | 0.3     | 0.1261 | -48.167 | 0        | 46.06667 | 0        | 14.85    | 3.925    |
| MAP3K4   | Mitogen-activated protein kinase kinase kinase 4        | 0       | 6.525   | 0      | 33.6083 | 0        | 74.03333 | 0.359337 | -96.3083 | -16.6917 |
| METTL18  | Histidine protein methyltransferase 1 homolog           | 0       | -11.867 | 0      | 246.325 | 0.176803 | -99.0083 | 0        | -6.7     | 24.48333 |
| PCBD2    | Pterin-4-alpha-carbinolamine dehydratase 2              | 0       | 51.575  | 0.3111 | -154.42 | 0        | 160.1083 | 0        | 15.81667 | -21.1167 |
| PSMC1P1  | -                                                       | 0       | 31.3833 | 0      | 193.658 | 0        | -36.5083 | 0.165339 | -288.35  | -190.542 |
| PUM1     | Pumilio homolog 1                                       | 0       | 61.5583 | 0      | -21.158 | 0        | 5.875    | 0.144704 | -194.758 | -128.917 |



|      |                          |   |         |        |         |   |          |          |          |          |
|------|--------------------------|---|---------|--------|---------|---|----------|----------|----------|----------|
| RHEB | GTP-binding protein Rheb | 0 | 57.5917 | 0      | -55.858 | 0 | -10.1333 | 0.153889 | -181.8   | 73.89167 |
| SPP1 | Osteopontin              | 0 | -52.383 | 0.2257 | -123.83 | 0 | 22.85833 | 0        | -35.2167 | -59.4    |

Supplementary Table 6: Literature references for genes associated with cancer progression

| Gene_ID  | Gene_Name                                                    | Reference                                                                                                                                                                                                                                |
|----------|--------------------------------------------------------------|------------------------------------------------------------------------------------------------------------------------------------------------------------------------------------------------------------------------------------------|
| ARCN1    | Coatomer subunit delta                                       | Kim, H. S. et al. Systematic identification of molecular subtype-selective vulnerabilities in non-small-cell lung cancer. <i>Cell</i> 155, 552-566 (2013).                                                                               |
| HMGB1    | High mobility group protein B1                               | Wang, X. et al. The Role of HMGB1 Signaling Pathway in the Development and Progression of Hepatocellular Carcinoma: A Review. <i>Int J Mol Sci</i> 16, 22527-22540 (2015).                                                               |
| ARL14EPL | ADP ribosylation factor like GTPase 14 effector protein like |                                                                                                                                                                                                                                          |
| RABIF    | Guanine nucleotide exchange factor MSS4                      |                                                                                                                                                                                                                                          |
| SARNP    | SAP domain-containing ribonucleoprotein                      | Hashii, Y. et al. A novel partner gene CIP29 containing a SAP domain with MLL identified in infantile myelomonocytic leukemia. <i>Leukemia</i> 18, 1546-1548 (2004).                                                                     |
| SEN7     | Sentrin-specific protease 7                                  | Bawa-Khalfe, T. et al. Differential expression of SUMO-specific protease 7 variants regulates epithelial-mesenchymal transition. <i>Proc. Natl. Acad. Sci. U.S.A.</i> 109, 17466-17471 (2012).                                           |
| AGFG1    | Arf-GAP domain and FG repeat-containing                      |                                                                                                                                                                                                                                          |
| ATP6V1E1 | V-type proton ATPase subunit E 1                             | Sreekumar, B. K. et al. Polarization of the vacuolar adenosine triphosphatase delineates a transition to high-grade pancreatic intraepithelial neoplasm lesions. <i>Pancreas</i> 43, 1256-1263 (2014).                                   |
| CORO1C   | Coronin-1C                                                   | Wu, L. et al. [Increased coronin-1C expression is related to hepatocellular carcinoma invasion and metastasis]. <i>Zhonghua Gan Zang Bing Za Zhi</i> 18, 516-519 (2010).                                                                 |
| HNRNPH1  | Heterogeneous nuclear ribonucleoprotein H                    | Lefave, C. V. et al. Splicing factor hnRNPH drives an oncogenic splicing switch in gliomas. <i>EMBO J.</i> 30, 4084-4097 (2011).                                                                                                         |
| IL2RG    | Cytokine receptor common subunit gamma                       | Agarwal, A. et al. Functional RNAi screen targeting cytokine and growth factor receptors reveals oncorequisite role for interleukin-2 gamma receptor in JAK3-mutation-positive leukemia. <i>Oncogene</i> 34, 2991-2999 (2015).           |
| KLHDC8A  | Kelch domain-containing protein 8A                           | Mukasa, A. et al. Mutant EGFR is required for maintenance of glioma growth in vivo, and its ablation leads to escape from receptor dependence. <i>Proc. Natl. Acad. Sci. U.S.A.</i> 107, 2616-2621 (2010).                               |
| PRPF40A  | Pre-mRNA-processing factor 40 homolog A                      |                                                                                                                                                                                                                                          |
| SETD5    | SET domain-containing protein 5                              |                                                                                                                                                                                                                                          |
| UTP11    | U3 small nucleolar RNA-associated protein                    |                                                                                                                                                                                                                                          |
| AGBL1    | Cytosolic carboxypeptidase 4                                 |                                                                                                                                                                                                                                          |
| COPZ1    | Coatomer subunit zeta-1                                      | Shtutman, M. et al. Tumor-specific silencing of COPZ2 gene encoding coatomer protein complex subunit $\zeta$ 2 renders tumor cells dependent on its paralogous gene COPZ1. <i>Proc. Natl. Acad. Sci. U.S.A.</i> 108, 12449-12454 (2011). |
| DDX24    | ATP-dependent RNA helicase DDX24                             |                                                                                                                                                                                                                                          |

|              |                                                                     |                                                                                                                                                                                                                                                                         |
|--------------|---------------------------------------------------------------------|-------------------------------------------------------------------------------------------------------------------------------------------------------------------------------------------------------------------------------------------------------------------------|
| EIF4B        | Eukaryotic translation initiation factor 4B                         | Degen, M., Barron, P., Natarajan, E., Widlund, H. R. & Rheinwald, J. G. RSK activation of translation factor eIF4B drives abnormal increases of laminin $\gamma$ 2 and MYC protein during neoplastic progression to squamous cell carcinoma. PLoS ONE 8, e78979 (2013). |
| GRB2         | Growth factor receptor-bound protein 2                              | Ahmed, Z. et al. Grb2 monomer-dimer equilibrium determines normal versus oncogenic function. Nat Commun 6, 7354 (2015).                                                                                                                                                 |
| KCTD1        | BTB/POZ domain-containing protein KCTD1                             | Li, X. et al. KCTD1 suppresses canonical Wnt signaling pathway by enhancing $\beta$ -catenin degradation. PLoS ONE 9, e94343 (2014).                                                                                                                                    |
| TMEM161B-AS1 | TMEM161B antisense RNA 1                                            |                                                                                                                                                                                                                                                                         |
| LOC727919    | NADH:ubiquinone oxidoreductase complex assembly factor 2 pseudogene |                                                                                                                                                                                                                                                                         |
| NIT2         | Omega-amidase NIT2                                                  | Zheng, B., Chai, R. & Yu, X. Downregulation of NIT2 inhibits colon cancer cell proliferation and induces cell cycle arrest through the caspase-3 and PARP pathways. Int. J. Mol. Med. 35, 1317-1322 (2015).                                                             |
| OCIAD2       | OCIA domain-containing protein 2                                    | Nagata, C. et al. Increased expression of OCIA domain containing 2 during stepwise progression of ovarian mucinous tumor. Pathol. Int. 62, 471-476 (2012).                                                                                                              |
| OXR1         | Serine/threonine-protein kinase OSR1                                |                                                                                                                                                                                                                                                                         |
| PDIA3        | Protein disulfide-isomerase A3                                      | Liao, C. J. et al. Glucose-regulated protein 58 modulates $\beta$ -catenin protein stability in a cervical adenocarcinoma cell line. BMC Cancer 14, 555 (2014).                                                                                                         |
| PLEKHA7      | Pleckstrin homology domain-containing family A member 7             | Tille, J. C. et al. The Expression of the Zonula Adhaerens Protein PLEKHA7 Is Strongly Decreased in High Grade Ductal and Lobular Breast Carcinomas. PLoS ONE 10, e0135442 (2015).                                                                                      |
| RPL35A       | 60S ribosomal protein L35a                                          | Kroes, R. A. et al. The identification of novel therapeutic targets for the treatment of malignant brain tumors. Cancer Lett. 156, 191-198 (2000).                                                                                                                      |
| RPL36AP7     | ribosomal protein L36a pseudogene 7                                 |                                                                                                                                                                                                                                                                         |
| SLC25A35     | Solute carrier family 25 member 35                                  |                                                                                                                                                                                                                                                                         |
| SORBS2       | Sorbin and SH3 domain-containing protein 2                          | Backsch, C. et al. An integrative functional genomic and gene expression approach revealed SORBS2 as a putative tumour suppressor gene involved in cervical carcinogenesis. Carcinogenesis 32, 1100-1106 (2011).                                                        |
| TERF2IP      | Telomeric repeat-binding factor 2-interacting protein 1             | Potrony, M. et al. Update in genetic susceptibility in melanoma. Ann Transl Med 3, 210 (2015).                                                                                                                                                                          |
| XPO5         | Exportin-5                                                          | Li, Y., Wang, X., He, B., Cai, H. & Gao, Y. Downregulation and tumor-suppressive role of XPO5 in hepatocellular carcinoma. Mol. Cell. Biochem. 415, 197-205 (2016).                                                                                                     |

|         |                                                  |                                                                                                                                                                                                            |
|---------|--------------------------------------------------|------------------------------------------------------------------------------------------------------------------------------------------------------------------------------------------------------------|
| ATRX    | Transcriptional regulator ATRX                   | Lee, J. C. et al. Alternative lengthening of telomeres and loss of ATRX are frequent events in pleomorphic and dedifferentiated liposarcomas. <i>Mod. Pathol.</i> 28, 1064-1073 (2015).                    |
| CDC26P1 | cell division cycle 26 pseudogene 1              |                                                                                                                                                                                                            |
| LSM5    | U6 snRNA-associated Sm-like protein LSm5         |                                                                                                                                                                                                            |
| MAP3K4  | Mitogen-activated protein kinase kinase kinase 4 | Whitmarsh, A. J. & Davis, R. J. Role of mitogen-activated protein kinase kinase 4 in cancer. <i>Oncogene</i> 26, 3172-3184 (2007).                                                                         |
| METTL18 | Histidine protein methyltransferase 1            |                                                                                                                                                                                                            |
| PCBD2   | Pterin-4-alpha-carbinolamine dehydratase         |                                                                                                                                                                                                            |
| PSMC1P1 | proteasome 26S subunit, ATPase 1                 |                                                                                                                                                                                                            |
| PUM1    | Pumilio homolog 1                                | Fernandez, S. et al. miR-340 inhibits tumor cell proliferation and induces apoptosis by targeting multiple negative regulators of p27 in non-small cell lung cancer. <i>Oncogene</i> 34, 3240-3250 (2015). |
| RHEB    | GTP-binding protein Rheb                         | Wang, Y. et al. Inhibition of MAPK pathway is essential for suppressing Rheb-Y35N driven tumor growth. <i>Oncogene</i> , (2016).                                                                           |
| SPP1    | Osteopontin                                      | Lin, J. et al. Osteopontin (OPN/SPP1) isoforms collectively enhance tumor cell invasion and dissemination in esophageal adenocarcinoma. <i>Oncotarget</i> 6, 22239-22257 (2015).                           |

Supplemental Table 7: List of primers used for amplification of the library

| Primer Name         | Primer Sequences                                                                                                                       |
|---------------------|----------------------------------------------------------------------------------------------------------------------------------------|
| FwdHTS              | TTCTCTGGCAAGCAAAGACGGCATA                                                                                                              |
| RevHTS              | TGCCATTTGTCTCGAGGTTCGAGAA                                                                                                              |
| FwdGex              | CAAGCAGAAGACGGCATAACGAGA                                                                                                               |
| Rev_Ind_1           | ACACGACGCTCTCCGATCT <b>ACAAGCTA</b> CGAAACCCCAAACGCACGAA                                                                               |
| Seq2N_AD            | AATGATACGGCGACCACCGAGATCTACACTCTTCCCTACACGACGCTCTCCGATCT                                                                               |
|                     |                                                                                                                                        |
| <b>Red letters:</b> | Primer Rev_Ind_1 represents series of index primes. All 50 indexes are in Supp Table 10.<br>The 8 base index sequence marked with red. |

Supplementary Table 8: List of individual indexes

| Index Num. | Sample Name | Index seq |
|------------|-------------|-----------|
| 1          | MDA-1A      | ACAAGCTA  |
| 2          | MDA-1B      | AAACATCG  |
| 3          | MDA-2A      | ACATTGGC  |
| 4          | MDA-2B      | ACCACTGT  |
| 5          | MDA-3A      | AACGTGAT  |
| 6          | MDA-3B      | CGCTGATC  |
| 7          | MDA-4A      | CAGATCTG  |
| 8          | MDA-4B      | ATGCCTAA  |
| 9          | MDA-5A      | CTGTAGCC  |
| 10         | MDA-5B      | AGTACAAG  |
| 11         | MDA-6A      | CATCAAGT  |
| 14         | BJ-1A       | AACCGAGA  |
| 15         | BJ-1B       | AACGCTTA  |
| 16         | BJ-2A       | AAGACGGA  |
| 17         | BJ-2B       | AAGGTACA  |
| 18         | BJ-3A       | ACACAGAA  |
| 19         | BJ-3B       | ACAGCAGA  |
| 20         | BJ-4A       | ACCTCCAA  |
| 21         | BJ-4B       | ACGCTCGA  |
| 22         | BJ-5A       | ACGTATCA  |
| 23         | BJ-5B       | ACTATGCA  |
| 26         | HT1080-1A   | AGCAGGAA  |
| 27         | HT1080-1B   | AGTCACTA  |
| 28         | HT1080-2A   | ATCCTGTA  |
| 29         | HT1080-2B   | ATTGAGGA  |
| 30         | HT1080-3A   | CAACCACA  |
| 31         | HT1080-3B   | CAAGACTA  |
| 32         | HT1080-4A   | CAATGGAA  |
| 33         | HT1080-4B   | CACTTCGA  |
| 34         | HT1080-5A   | CAGCGTTA  |
| 38         | HCT116-1A   | CCGTGAGA  |
| 39         | HCT116-1B   | CCTCCTGA  |
| 40         | HCT116-2A   | CGAACTTA  |
| 41         | HCT116-2B   | CGACTGGA  |
| 42         | HCT116-3A   | CGCATACA  |
| 43         | HCT116-3B   | CTCAATGA  |
| 44         | HCT116-4A   | CTGAGCCA  |
| 45         | HCT116-4B   | CTGGCATA  |
| 46         | HCT116-5A   | GAATCTGA  |
| 47         | HCT116-5B   | GACTAGTA  |
| 51         | PC3-1A      | GCGAGTAA  |
| 52         | PC3-1B      | GCTAACGA  |
| 53         | PC3-2A      | GCTCGGTA  |
| 54         | PC3-2B      | GGAGAACA  |

|    |        |          |
|----|--------|----------|
| 55 | PC3-3A | GGTGCGAA |
| 56 | PC3-3B | GTACGCAA |
| 57 | PC3-4A | GTCGTAGA |
| 58 | PC3-4B | GTCTGTCA |
| 59 | PC3-5A | GTGTTCTA |
| 60 | PC3-5B | TAGGATGA |

Supplemental Table 9 siRNA screenings results

| siRNA         | BJ-hTERT | HCT-116  | MB-231   | PC-3     |
|---------------|----------|----------|----------|----------|
| Mock          | 1        | 1        | 1        | 1        |
| Non-targeting | 0.993637 | 1.076347 | 1.145371 | 1.236729 |
| Empty         | 0.995182 | 0.940182 | 1.05333  | 1.053895 |
| AGBL1         | 0.993353 | 0.829061 | 0.94132  | 0.968732 |
| HNRNPH1       | 1.008916 | 0.706796 | 0.887928 | 0.950942 |
| PCBD2         | 0.994845 | 0.973945 | 0.957894 | 1.045638 |
| SETD5         | 1.000087 | 0.748977 | 0.898195 | 1.077305 |
| AGFG1         | 0.994808 | 0.938085 | 1.028644 | 0.9287   |
| IL2RG         | 0.996655 | 0.963529 | 1.293999 | 1.290599 |
| PDIA3         | 0.992133 | 0.928903 | 1.11852  | 1.121697 |
| SLC25A35      | 0.995125 | 0.996245 | 1.01256  | 1.077171 |
| ARCN1         | 0.989305 | 0.265602 | 0.323694 | 0.297051 |
| KCTD1         | 0.997719 | 0.992288 | 1.070425 | 1.118217 |
| PLEKHA7       | 0.995435 | 1.110114 | 0.985993 | 1.312232 |
| SORBS2        | 0.997753 | 1.056556 | 1.089335 | 1.01474  |
| ATP6V1E1      | 0.993027 | 1.116636 | 0.982125 | 0.955134 |
| KLHDC8A       | 1.005215 | 0.895708 | 1.265156 | 1.104444 |
| PRPF40A       | 0.9932   | 1.085609 | 0.980048 | 0.980877 |
| SPP1          | 0.997114 | 1.164841 | 1.005836 | 1.182003 |
| ATRX          | 0.991238 | 0.935701 | 1.260971 | 0.848173 |
| LSM5          | 0.99214  | 0.942326 | 0.982554 | 0.571907 |
| PUM1          | 0.992634 | 0.990456 | 1.012888 | 0.99408  |
| TERF2IP       | 1.000324 | 1.102796 | 1.102099 | 1.008148 |
| CORO1C        | 0.987569 | 1.175916 | 1.003253 | 0.879636 |
| MAP3K4        | 0.996622 | 1.006132 | 1.108993 | 0.934333 |
| RABIF         | 0.998564 | 1.01153  | 1.184535 | 1.032891 |
| UTP11L        | 0.998573 | 0.81696  | 0.843181 | 0.863122 |
| DDX24         | 0.993122 | 0.652864 | 0.593598 | 0.567028 |
| METTL18       | 1.009398 | 1.076623 | 1.0784   | 1.05731  |
| RHEB          | 0.996713 | 1.104943 | 1.284004 | 0.906698 |
| XPO5          | 0.987849 | 1.166598 | 1.029362 | 0.925374 |
| EIF4B         | 0.995085 | 0.917745 | 0.95623  | 0.87972  |
| NIT2          | 0.996144 | 1.103389 | 1.151813 | 1.239495 |
| RPL35A        | 0.8349   | 0.255282 | 0.29914  | 0.343375 |
| GRB2          | 0.991738 | 0.581017 | 1.017937 | 0.979098 |
| OCIAD2        | 0.993775 | 1.002994 | 1.212914 | 1.177656 |
| SARNP         | 0.994299 | 0.978375 | 1.19879  | 0.995627 |
| HMGB1         | 0.987477 | 0.892343 | 1.056406 | 0.952099 |
| OXR1          | 1.003865 | 0.969629 | 1.03246  | 1.096614 |
| SENP7         | 0.995039 | 1.018165 | 0.988002 | 1.114387 |
